# Supplementary material for: El grupo parlamentario como titular del "derecho de voto colectivo"
Source: Royal Society of Chemistry journal article supplement (doi:10.1039/d4dt01513d), 2007-01-01
Supplement: d4dt01513d1.pdf [file d4dt01513d1.pdf]

## Electronic Supporting Information

### **Ni(II) and Pd(II) complexes of a new redox-active pentadentate azo-appended 2-aminophenol ligand: Pd(II)-assisted intraligand cyclization forms phenoxazinyl ring**

Saumitra Bhowmik, Arunava Sengupta and Rabindranath Mukherjee\*

#### **Figures:**

**Fig. S1**  $^1\text{H}$  NMR ( $\text{CDCl}_3$ , 500 MHz) spectrum of  $\text{H}_4\text{L}$ .

**Fig. S2**  $^{13}\text{C}$  NMR ( $\text{CDCl}_3$ , 125 MHz) spectrum of  $\text{H}_4\text{L}$ .

**Fig. S3** Positive-Ion ESI-MS spectrum of  $\{[\text{H}_4\text{L}] + \text{H}^+\}$ . The isotope distribution patterns of the molecular ion peaks shown in insets.

**Fig. S4** Positive-Ion ESI-MS spectrum of  $[\text{Ni}(\text{L})]$  (**1**). The isotope distribution patterns of the molecular ion peaks shown in insets.

**Fig. S5** Positive-Ion ESI-MS spectrum of  $[\text{Pd}(\text{L})]$  (**2**). The isotope distribution patterns of the molecular ion peaks shown in insets.

**Fig. S6** Cyclic voltammogram (100 mV/s) of a 1.0 mM solution of  $[\text{Ni}(\text{L})]\text{SbF}_6 \cdot 2\text{CH}_2\text{Cl}_2$  (**3**• $2\text{CH}_2\text{Cl}_2$ ), in  $\text{CH}_2\text{Cl}_2$  (0.1 M in TBAP) at a platinum working electrode.

**Fig. S7** Positive-Ion ESI-MS spectrum of  $[\text{Ni}(\text{L})]\text{SbF}_6 \cdot 2\text{CH}_2\text{Cl}_2$  (**3**• $2\text{CH}_2\text{Cl}_2$ ).

**Fig. S8**  $^1\text{H}$  NMR spectra (500 MHz,  $\text{CDCl}_3$ ) of complex **3**.

**Fig. S9** X-band EPR spectra for **1** as solid recorded at (a) 300 K and (b) 80 K, along with their simulated versions.

**Fig. S10** X-band EPR spectra for **2** as solid recorded at (a) 300 K and (b) 80 K, along with their simulated versions.

**Fig. S11** Positive-Ion ESI-MS spectrum of  $[\text{Pd}(\text{L}^*)]$  (**4**). The isotope distribution patterns of the molecular ion peaks shown in insets.

**Fig. S12** X-band EPR spectra for **4** as solid recorded at (a) 300 K and (b) 80 K, along with their simulated versions.

**Fig. S13** TD-DFT-calculated electronic spectrum for  $[\text{Ni}(\text{L})]$  (**1**).

**Fig. S14** Representative molecular-orbitals involved in TD-DFT transitions for  $[\text{Ni}(\text{L})]$  (**1**).

**Fig. S15** TD-DFT-calculated electronic spectrum for  $[\text{Ni}(\text{L})]\text{SbF}_6 \cdot 2\text{CH}_2\text{Cl}_2$  (**3**• $2\text{CH}_2\text{Cl}_2$ ).

**Fig. S16** Representative molecular-orbitals involved in TD-DFT transitions for  $[\text{Ni}(\text{L})]\text{SbF}_6 \cdot 2\text{CH}_2\text{Cl}_2$  (**3**• $2\text{CH}_2\text{Cl}_2$ ).

**Fig. S17** TD-DFT-calculated electronic spectrum for  $[\text{Pd}(\text{L})]$  (**2**).

**Fig. S18** Representative molecular-orbitals involved in TD-DFT transitions for  $[\text{Pd}(\text{L})]$  (**2**).

**Fig. S19** TD-DFT-calculated electronic spectrum for  $[\text{Pd}(\text{L}^*)]$  (**4**).

**Fig. S20** Representative molecular-orbitals involved in TD-DFT transitions for  $[\text{Pd}(\text{L}^*)]$  (**4**).

#### **Tables:**

**Table S1** Data collection and structure refinement parameters for  $[\text{Ni}(\text{L})]$  (**1**),  $[\text{Pd}(\text{L})]$  (**2**),  $[\text{Ni}(\text{L})]\text{SbF}_6 \cdot 2\text{CH}_2\text{Cl}_2$  (**3**• $2\text{CH}_2\text{Cl}_2$ ) and  $[\text{Pd}(\text{L}^*)]$  (**4**).

**Table S2** Bond angles for  $[\text{Ni}(\text{L})]$  (**1**),  $[\text{Pd}(\text{L})]$  (**2**),  $[\text{Ni}(\text{L})]\text{SbF}_6 \cdot 2\text{CH}_2\text{Cl}_2$  (**3**• $2\text{CH}_2\text{Cl}_2$ ) and  $[\text{Pd}(\text{L}^*)]$  (**4**).

**Table S3** X-ray Structural and DFT-Optimized Bond Lengths of **1–4**.

**Table S4** Geometry-optimised cartesian coordinates for [Ni(L)] (**1**).

**Table S5** Geometry-optimised cartesian coordinates for [Ni(L)]SbF<sub>6</sub>•2CH<sub>2</sub>Cl<sub>2</sub> (**3**•2CH<sub>2</sub>Cl<sub>2</sub>).

**Table S6** Geometry-optimised cartesian coordinates for [Pd(L)] (**2**).

**Table S7** Geometry-optimised cartesian coordinates for [Pd(L<sup>\*</sup>)] (**4**).

**Table S8** TD-DFT-calculated absorption spectral result for [Ni(L)] (**1**).

**Table S9** TD-DFT-calculated absorption spectral result for [Ni(L)]SbF<sub>6</sub>•CH<sub>2</sub>Cl<sub>2</sub> (**3**•2CH<sub>2</sub>Cl<sub>2</sub>).

**Table S10** TD-DFT-calculated absorption spectral result for [Pd(L)] (**2**).

**Table S11** TD-DFT-calculated absorption spectral result for [Pd(L<sup>\*</sup>)] (**4**).

**Scheme S1** Explanation for metal ion azo bond switchover.

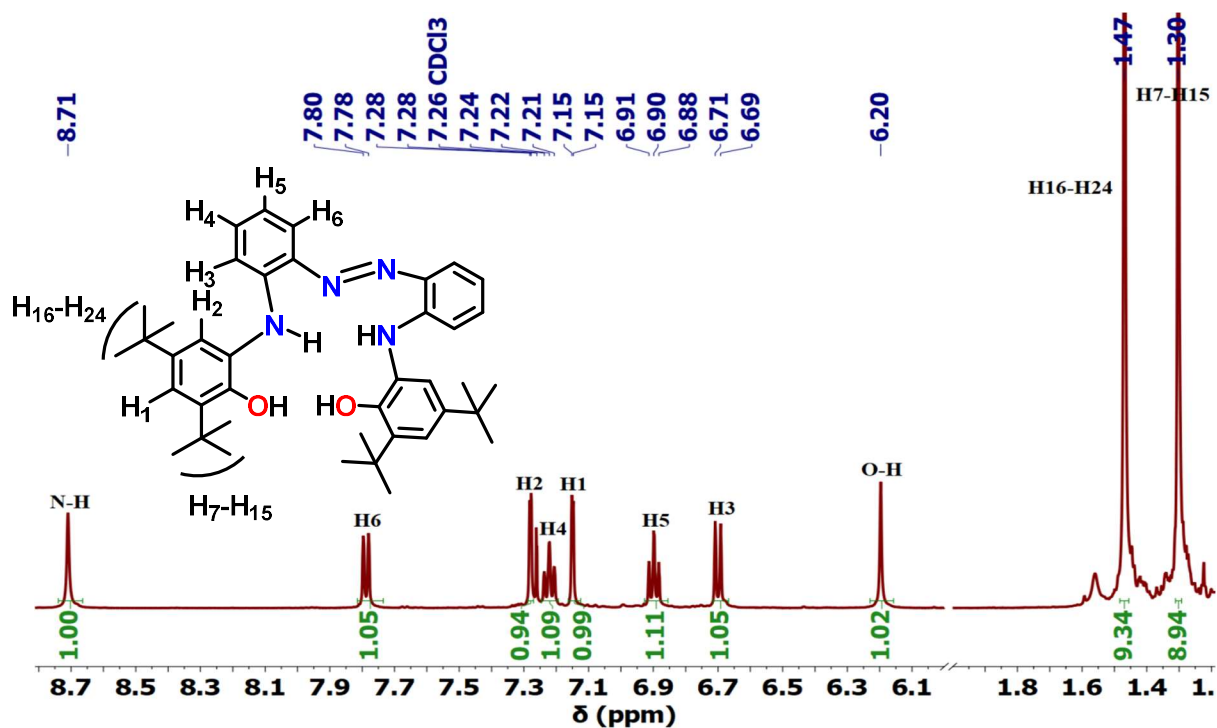

Fig. S1 <sup>1</sup>H NMR (CDCl<sub>3</sub>, 500 MHz) spectrum of H<sub>4</sub>L .

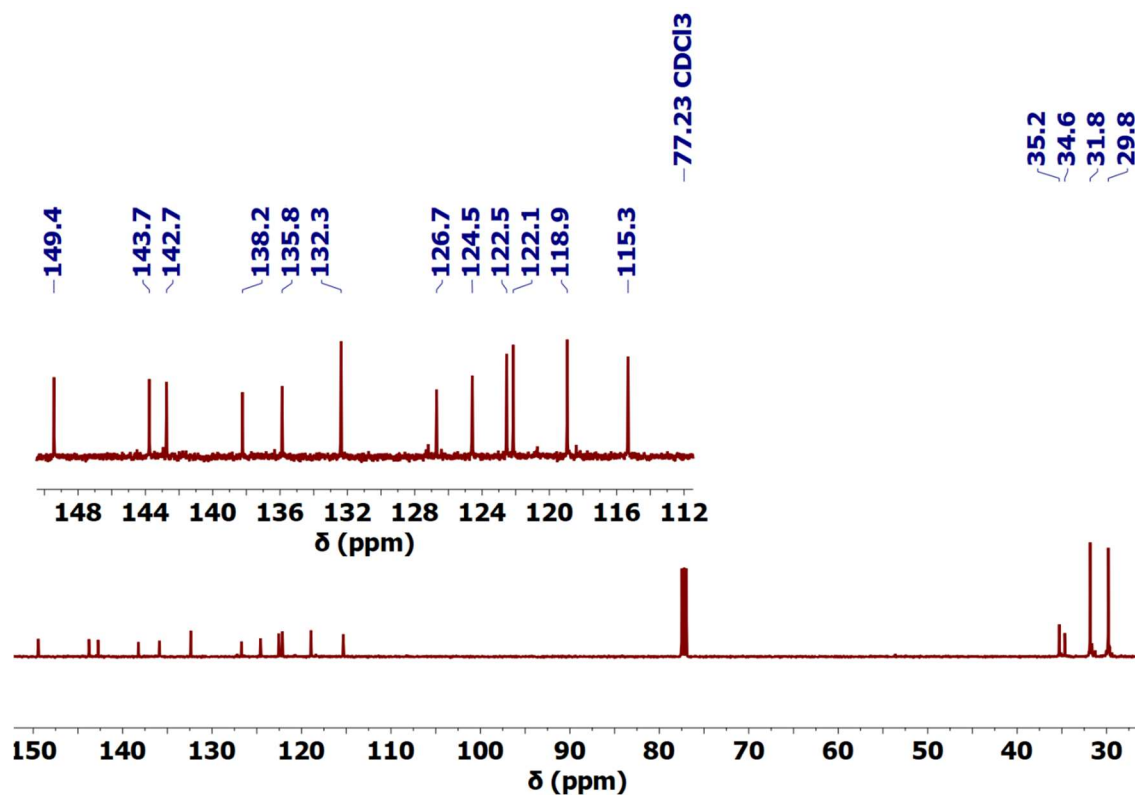

Fig. S2 <sup>13</sup>C NMR (CDCl<sub>3</sub>, 125 MHz) spectrum of H<sub>4</sub>L.

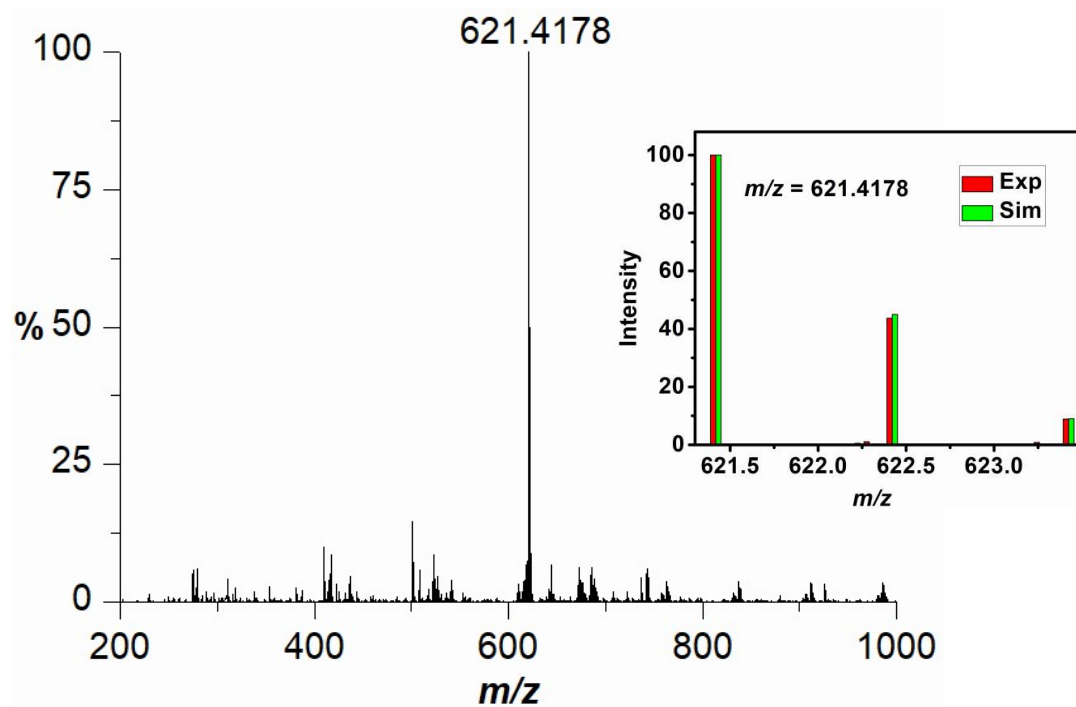

**Fig. S3** Positive-Ion ESI-MS spectrum of  $\{[H_4L] + H^+\}$ . The isotope distribution patterns of the molecular ion peaks shown in insets.

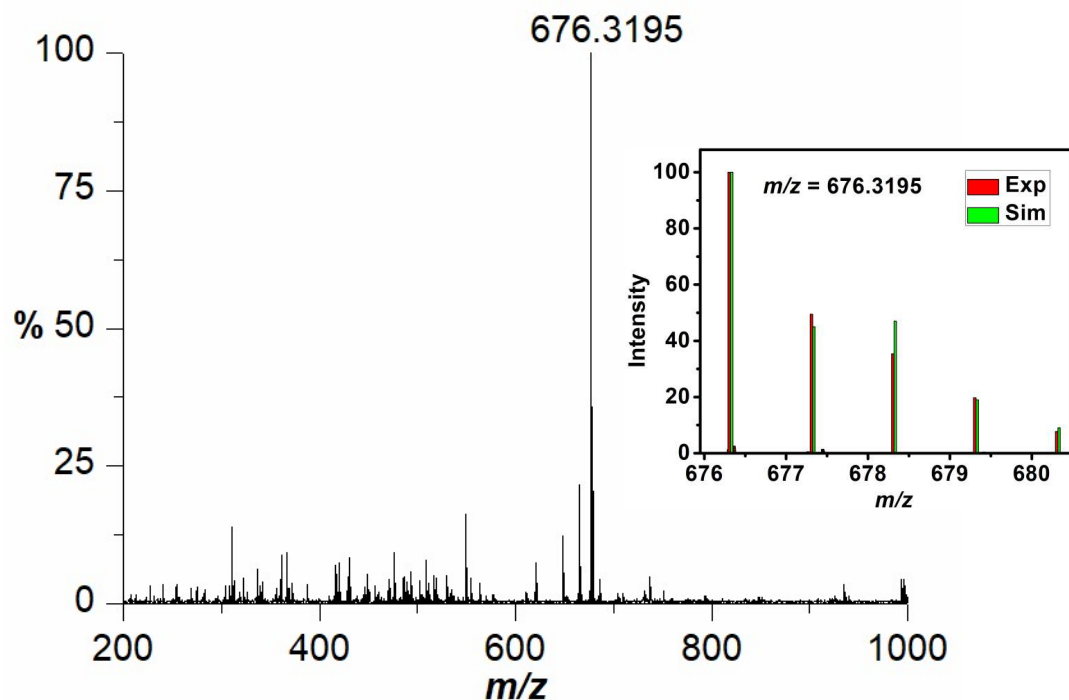

**Fig. S4** Positive-Ion ESI-MS spectrum of  $[Ni(L)]$  (**1**):  $\{[Ni(L)] + H^+\}$ . The isotope distribution patterns of the molecular ion peaks shown in insets.

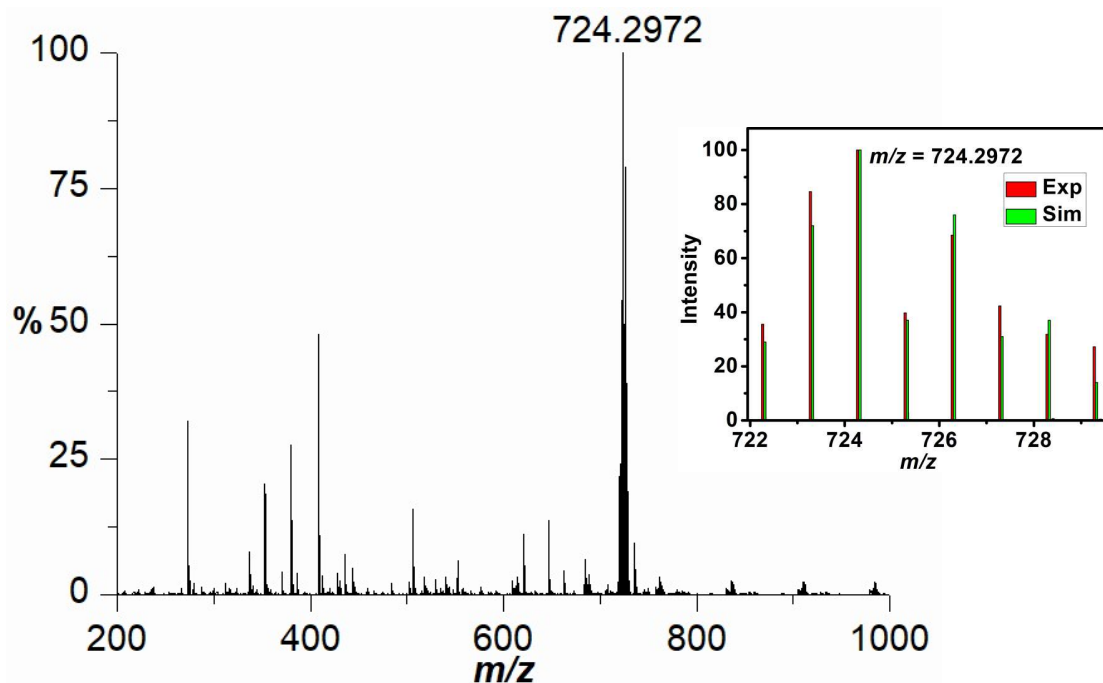

**Fig. S5** Positive-Ion ESI-MS spectrum of [Pd(L)] (2):  $\{[Pd(L)] + H^+\}$ . The isotope distribution patterns of the molecular ion peaks shown in insets.

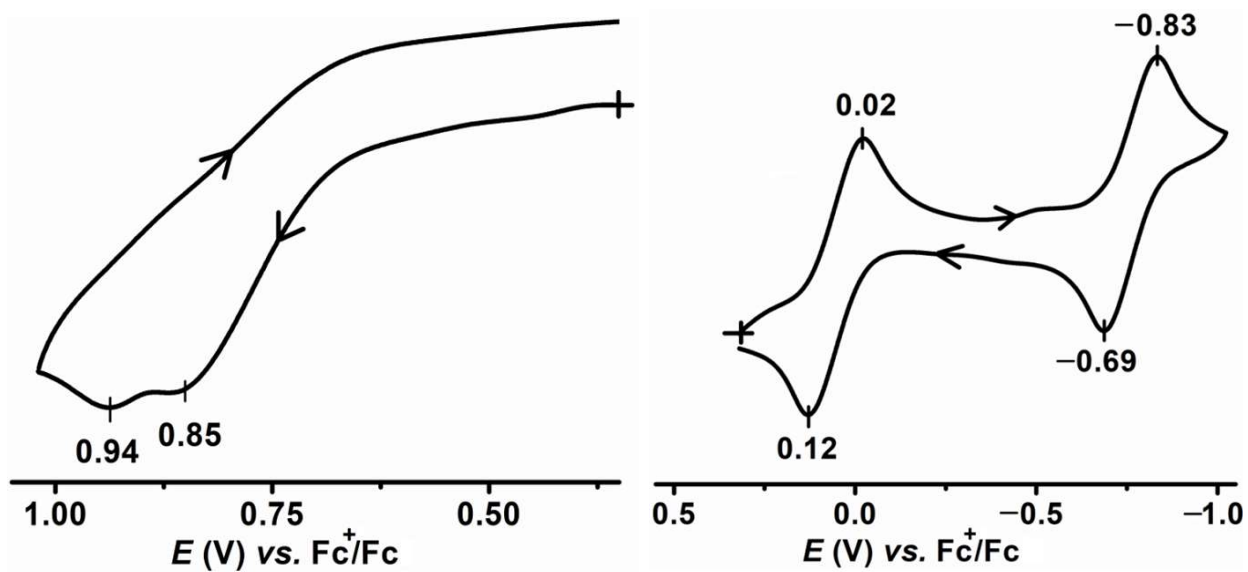

**Fig. S6** Cyclic voltammogram (100 mV/s) of a 1.0 mM solution of  $[Ni(L)]SbF_6 \cdot 2CH_2Cl_2$  ( $3 \cdot 2CH_2Cl_2$ ), in  $CH_2Cl_2$  (0.1 M in TBAP) at a platinum working electrode.

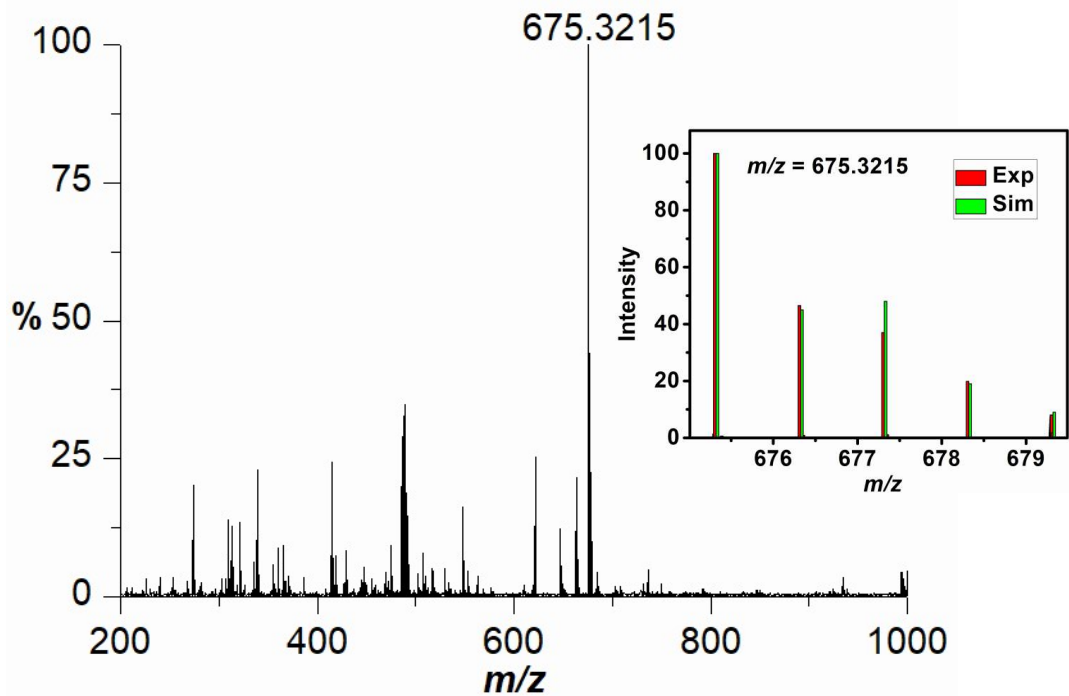

**Fig. S7** Positive-Ion ESI-MS spectrum of  $[\text{Ni}(\text{L})](\text{SbF}_6) \cdot 2\text{CH}_2\text{Cl}_2$  ( $3 \cdot 2\text{CH}_2\text{Cl}_2$ ):  $\{[\text{Ni}(\text{L})]^+\}$ . The isotope distribution patterns of the molecular ion peaks shown in insets.

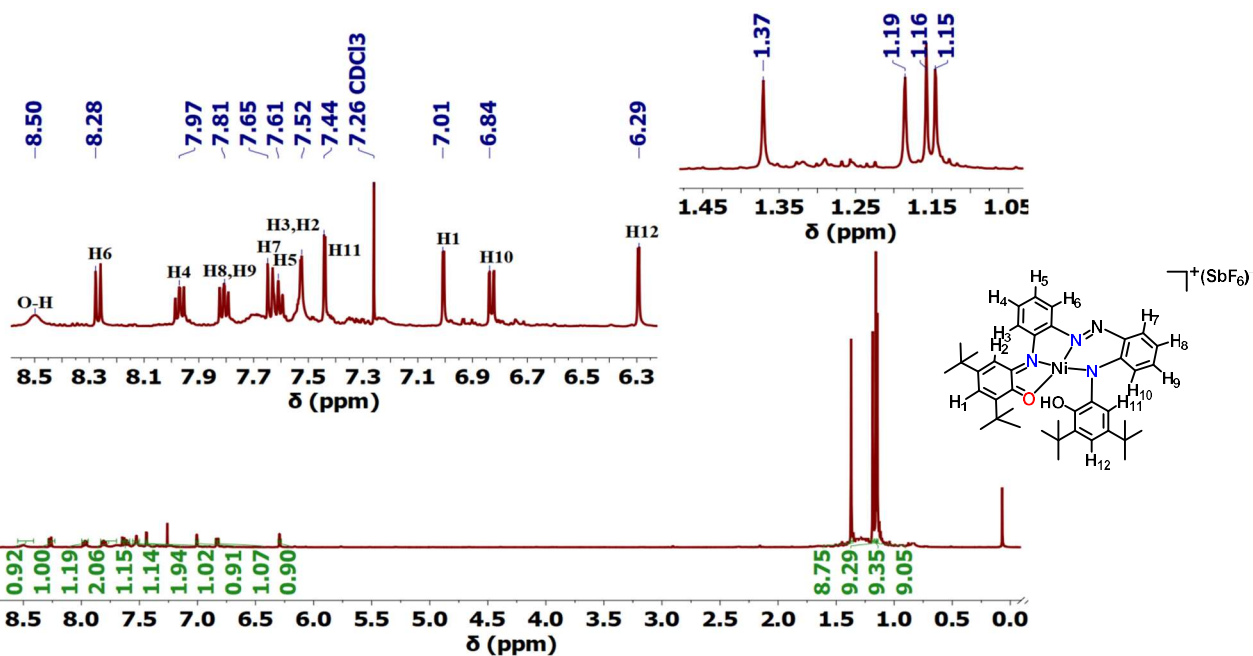

**Fig. S8**  $^1\text{H}$  NMR spectra (500 MHz,  $\text{CDCl}_3$ ) of complex **3**.

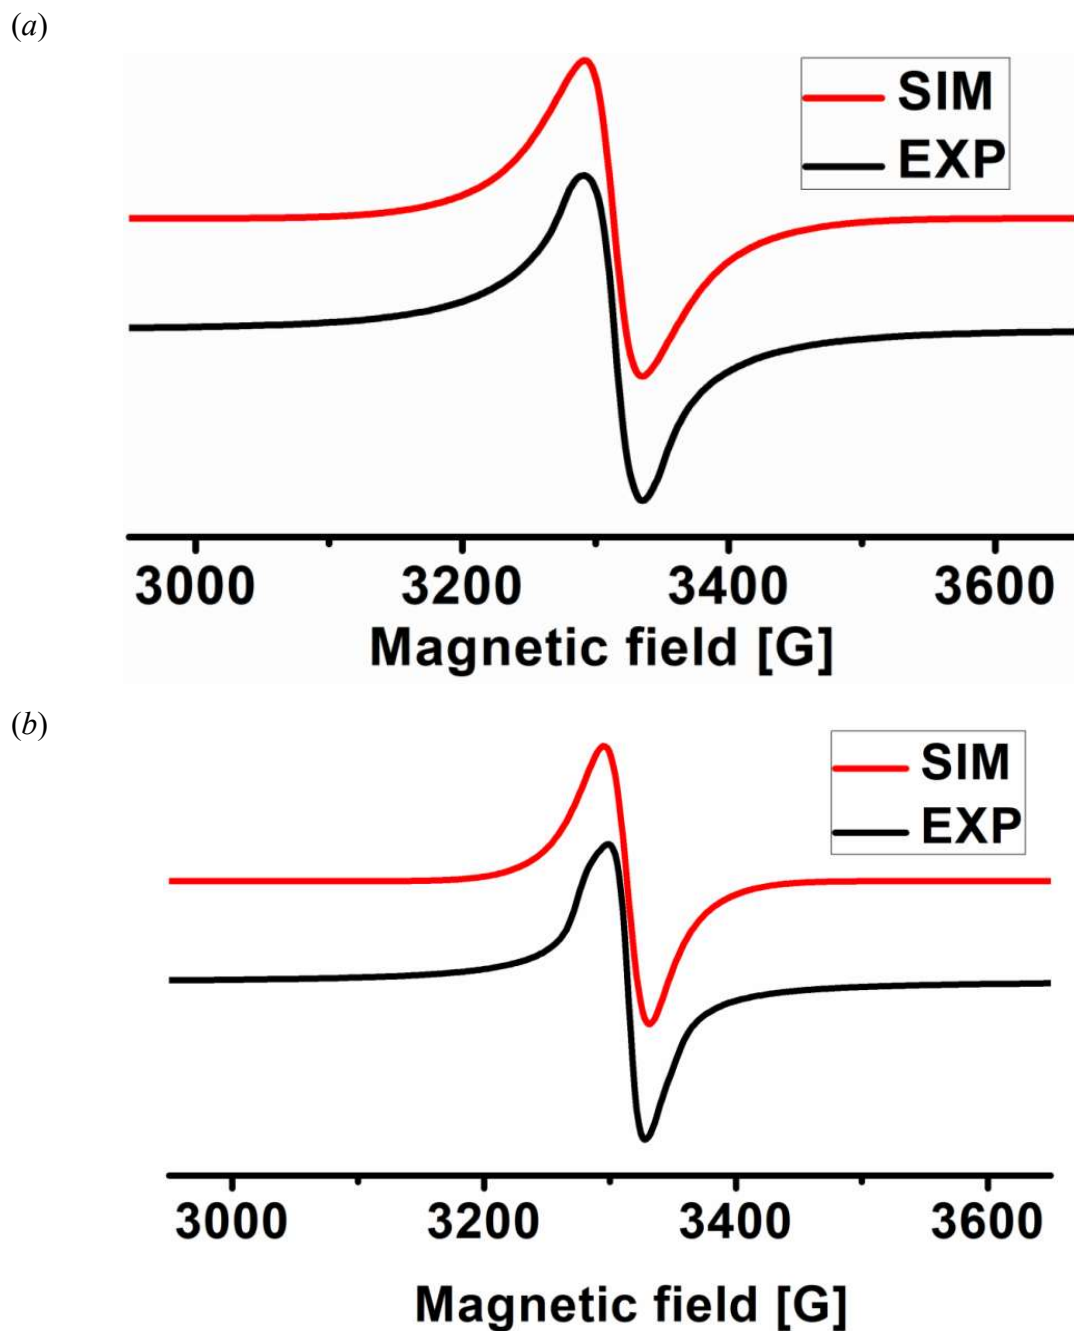

**Fig. S9** X-band EPR spectrum ( $\nu = 9.460$  GHz, power = 0.201 mW, receiver gain =  $1 \times 10^2$ , modulation frequency = 100 KHz, modulation amplitude = 5.00 G) for **1** as solid recorded (a) as solid at 298 K, upper trace: simulated parameters:  $g_x = g_y = g_z = 2.0075$ ;  $W_x = 60$  G,  $W_y = 185$  G,  $W_z = 20$  G; (b) as solid at 80 K, simulated parameters:  $g_x = g_y = g_z = 2.00757$ ;  $W_x = 35$  G,  $W_y = 115$  G,  $W_z = 20$  G. Error limits:  $g \pm 0.002$ ;  $A \pm 0.0001$  cm<sup>-1</sup>;  $W \pm 1$ .

(a)

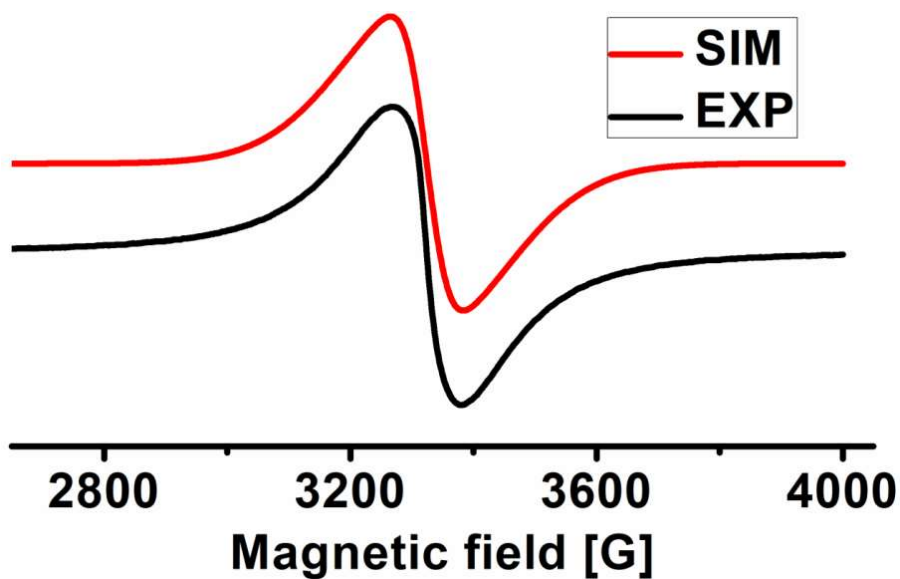

(b)

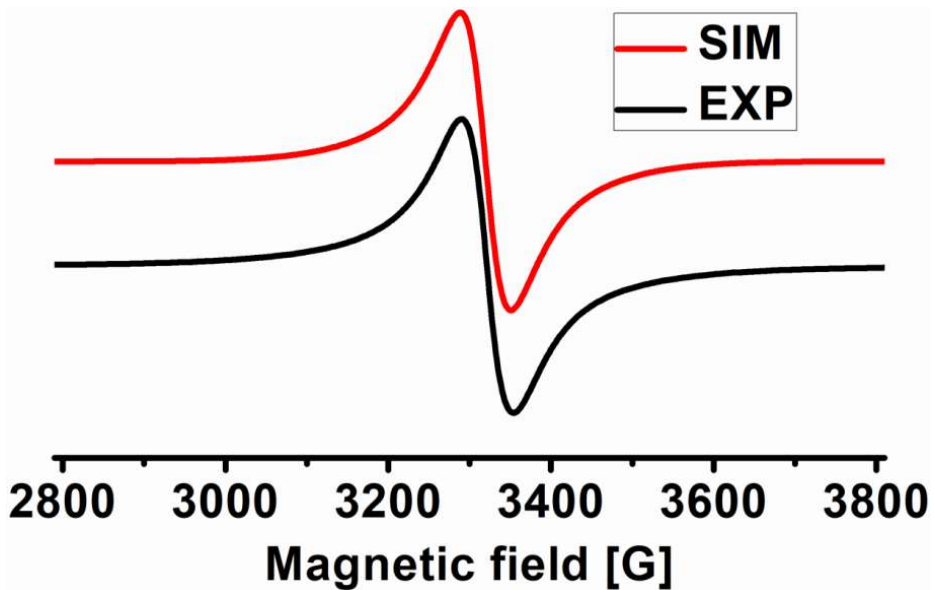

**Fig. S10** X-band EPR spectrum ( $\nu = 9.460$  GHz, power = 0.201 mW, receiver gain =  $1 \times 10^2$ , modulation frequency = 100 KHz, modulation amplitude = 5.00 G) for **2** as solid recorded at (a) as solid at 298 K, upper trace: simulated parameters:  $g_x = g_y = g_z = 1.9988$ ;  $W_x = 55$  G,  $W_y = 225$  G,  $W_z = 325$  G; (b) as solid at 80 K, upper trace: simulated parameters:  $g_x = g_y = g_z = 2.00378$ ;  $W_x = 30$  G,  $W_y = 275$  G,  $W_z = 75$  G. Error limits:  $g \pm 0.002$ ;  $A \pm 0.0001$  cm<sup>-1</sup>;  $W \pm 1$ .



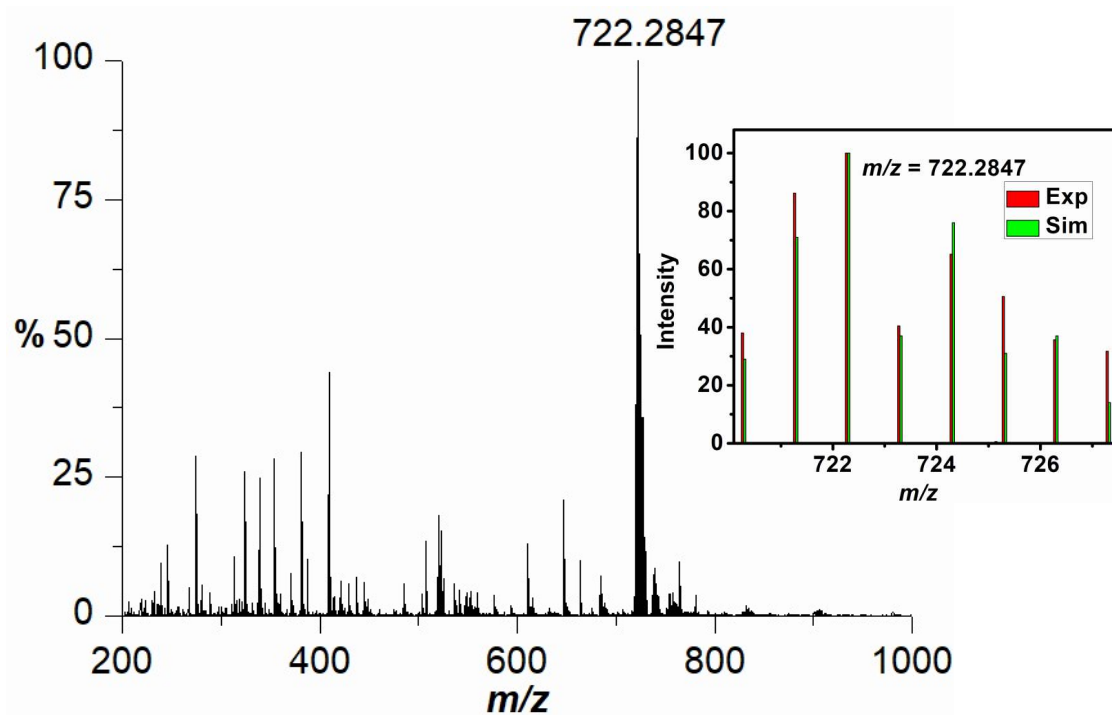

**Fig. S11** Positive-Ion ESI-MS spectrum of  $[\text{Pd}(\text{L}^*)]$  (**4**):  $\{[\text{Pd}(\text{L}^*)] + \text{H}^+\}$ . The isotope distribution patterns of the molecular ion peaks shown in insets.

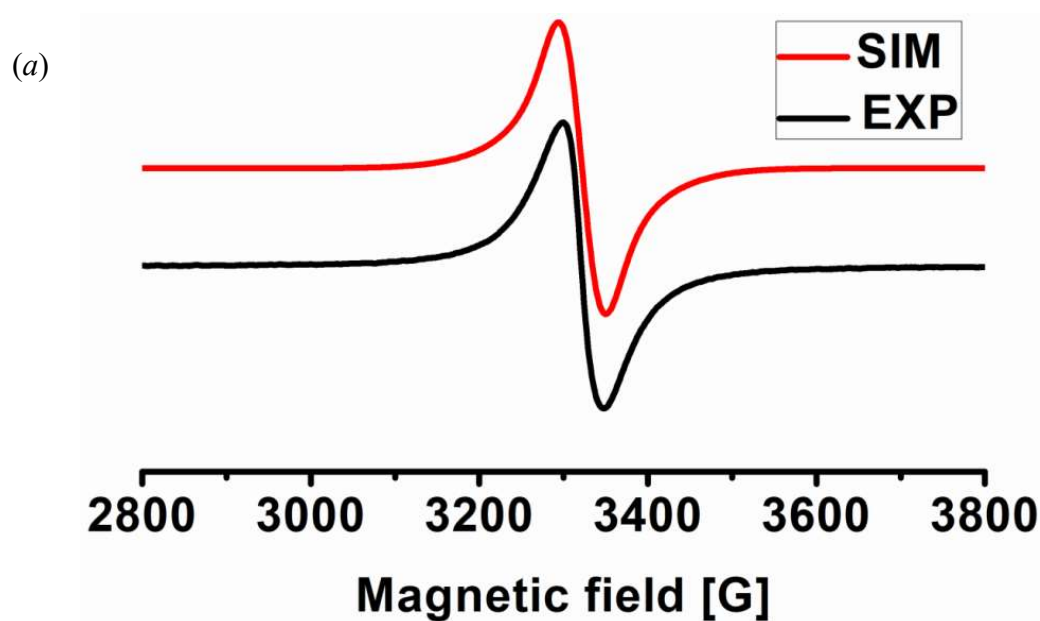

(b)

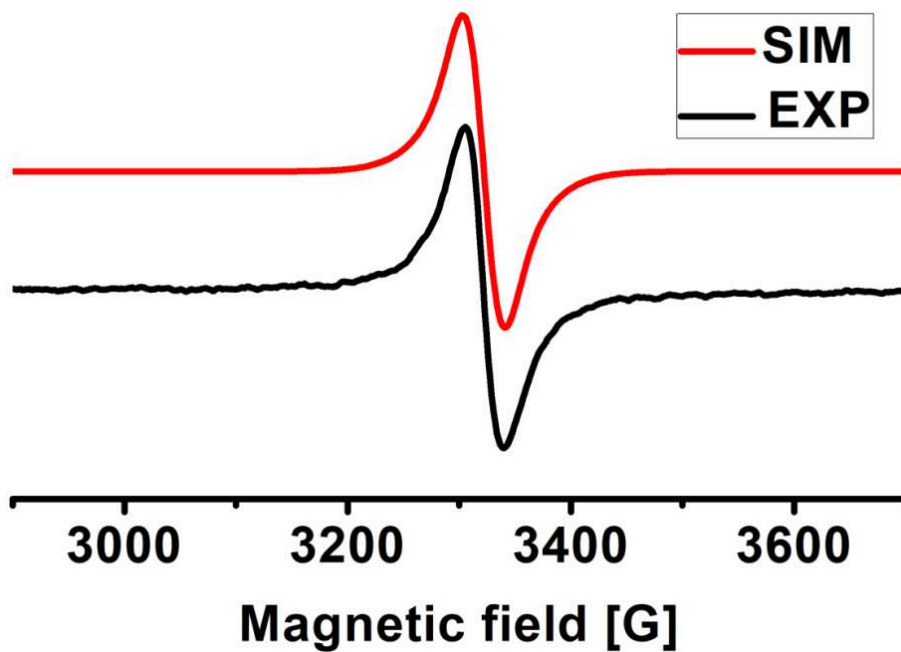

**Fig. S12** X-band EPR spectrum ( $\nu = 9.460$  GHz, power = 0.201 mW, receiver gain =  $1 \times 10^2$ , modulation frequency = 100 KHz, modulation amplitude = 5.00 G) for **4** as solid recorded at (a) as solid at 298 K, upper trace: simulated parameters:  $g_x = g_y = g_z = 2.00238$ ;  $W_x = 40$  G,  $W_y = 190$  G,  $W_z = 45$  G; (b) as solid at 80 K, upper trace: simulated parameters:  $g_x = g_y = g_z = 2.00232$ ;  $W_x = 35$  G,  $W_y = 105$  G,  $W_z = 25$  G. Error limits:  $g \pm 0.002$ ;  $A \pm 0.0001 \text{ cm}^{-1}$ ;  $W \pm 1$ .

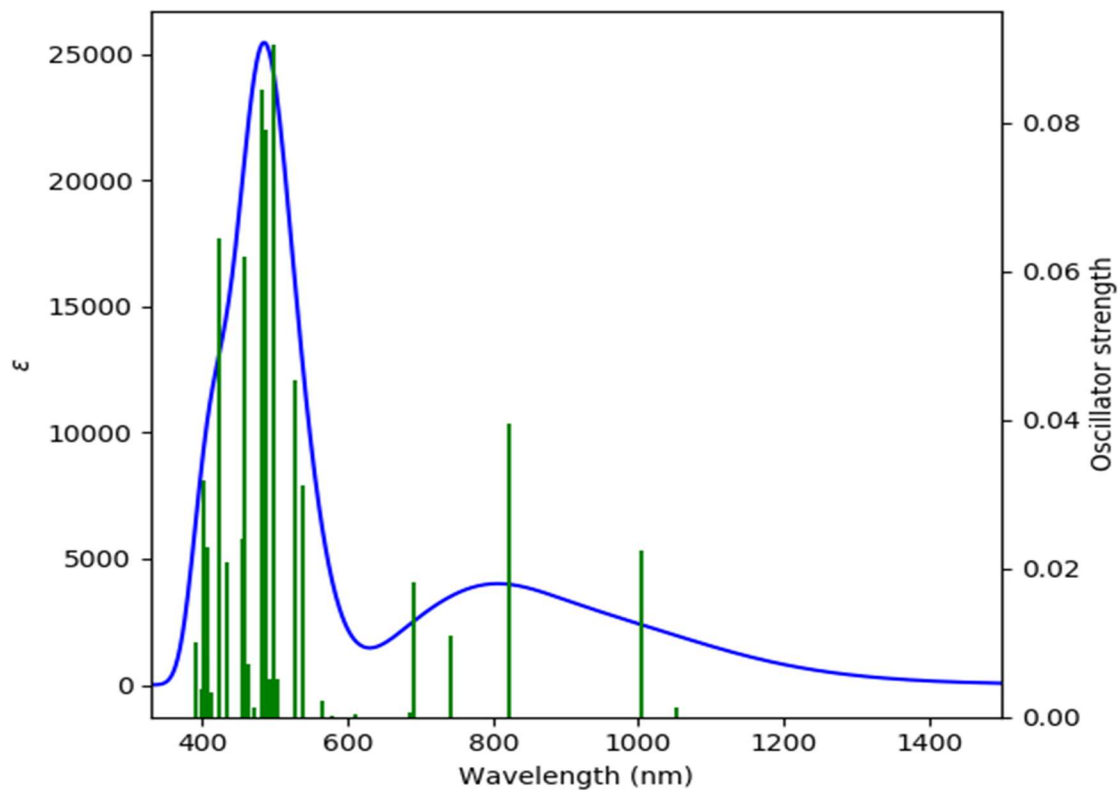

**Fig. S13** TD-DFT calculated electronic spectra for  $[\text{Ni}^{\text{II}}\{(\text{L}^{\text{ISQ}})^{2-}\}]$  (**1**).

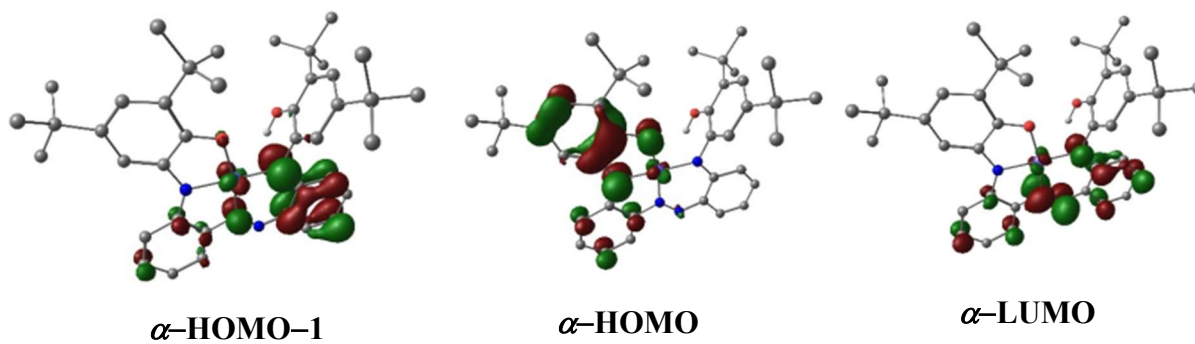

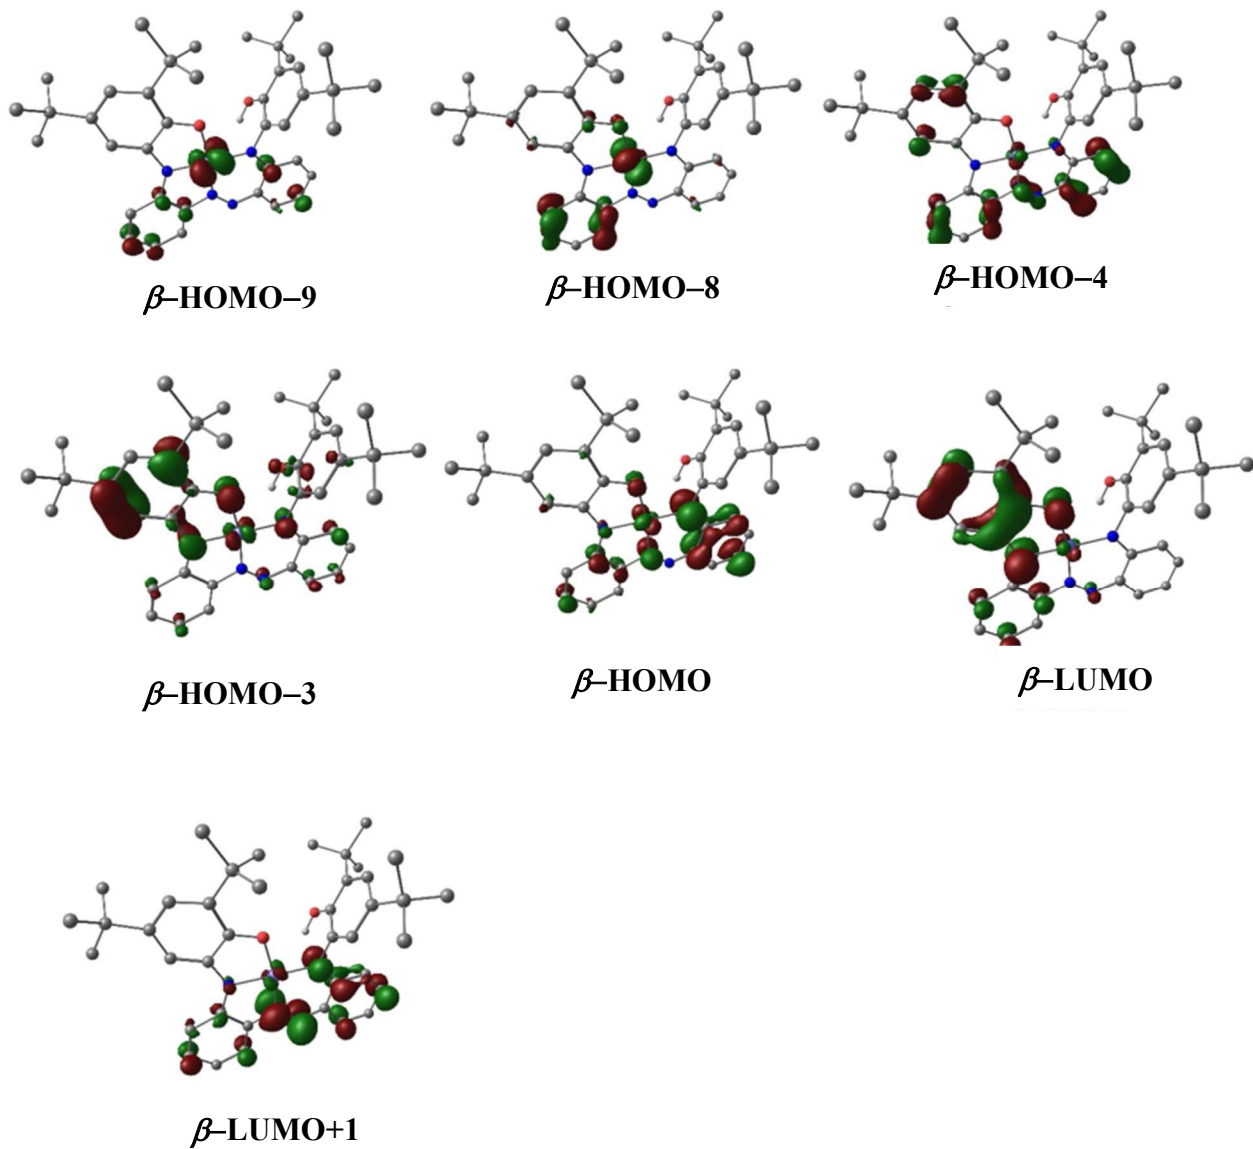

**Fig. S14.** Representative molecular orbitals involved in TD-DFT transitions of  $[\text{Ni}^{\text{II}}\{(\text{L}^{\text{ISQ}})^{2-}\}]$  (1).

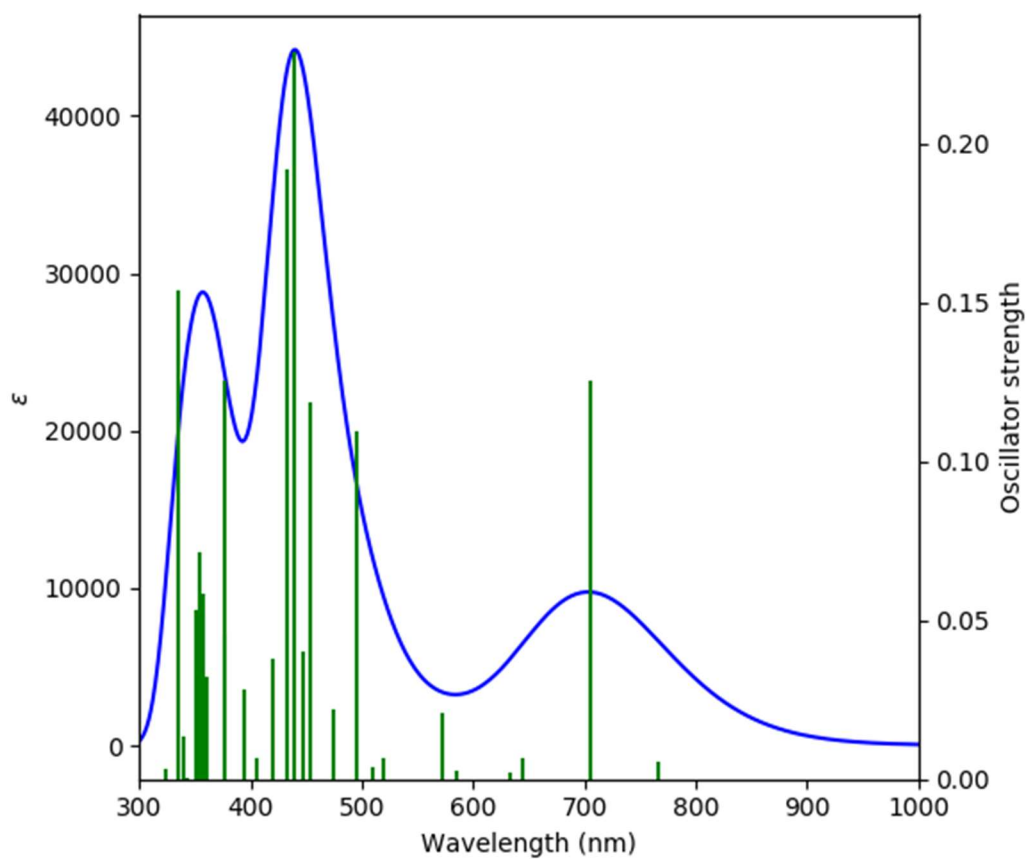

**Fig. S15** TD-DFT calculated electronic spectra for  $[\text{Ni}^{\text{II}}\{(\text{L}^{\text{IBQ}})^{1-}\}]^{1+}$  ( $1^+/3$ ).

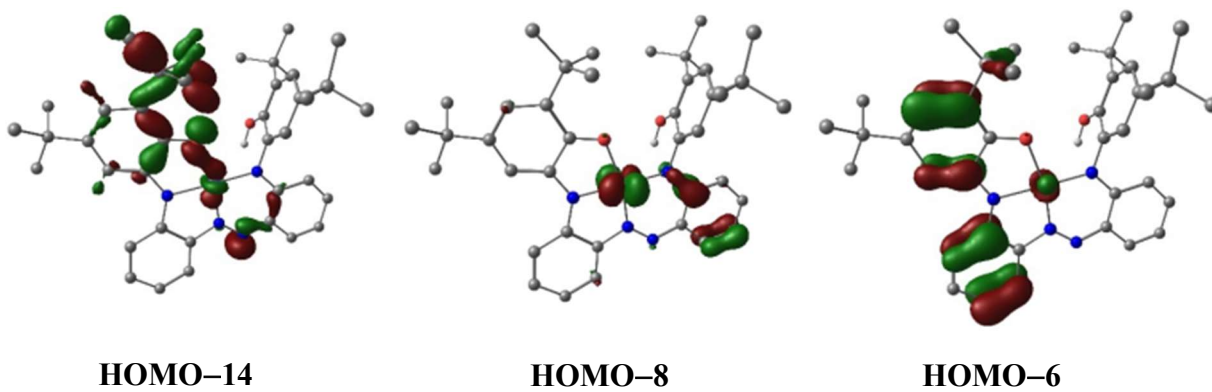

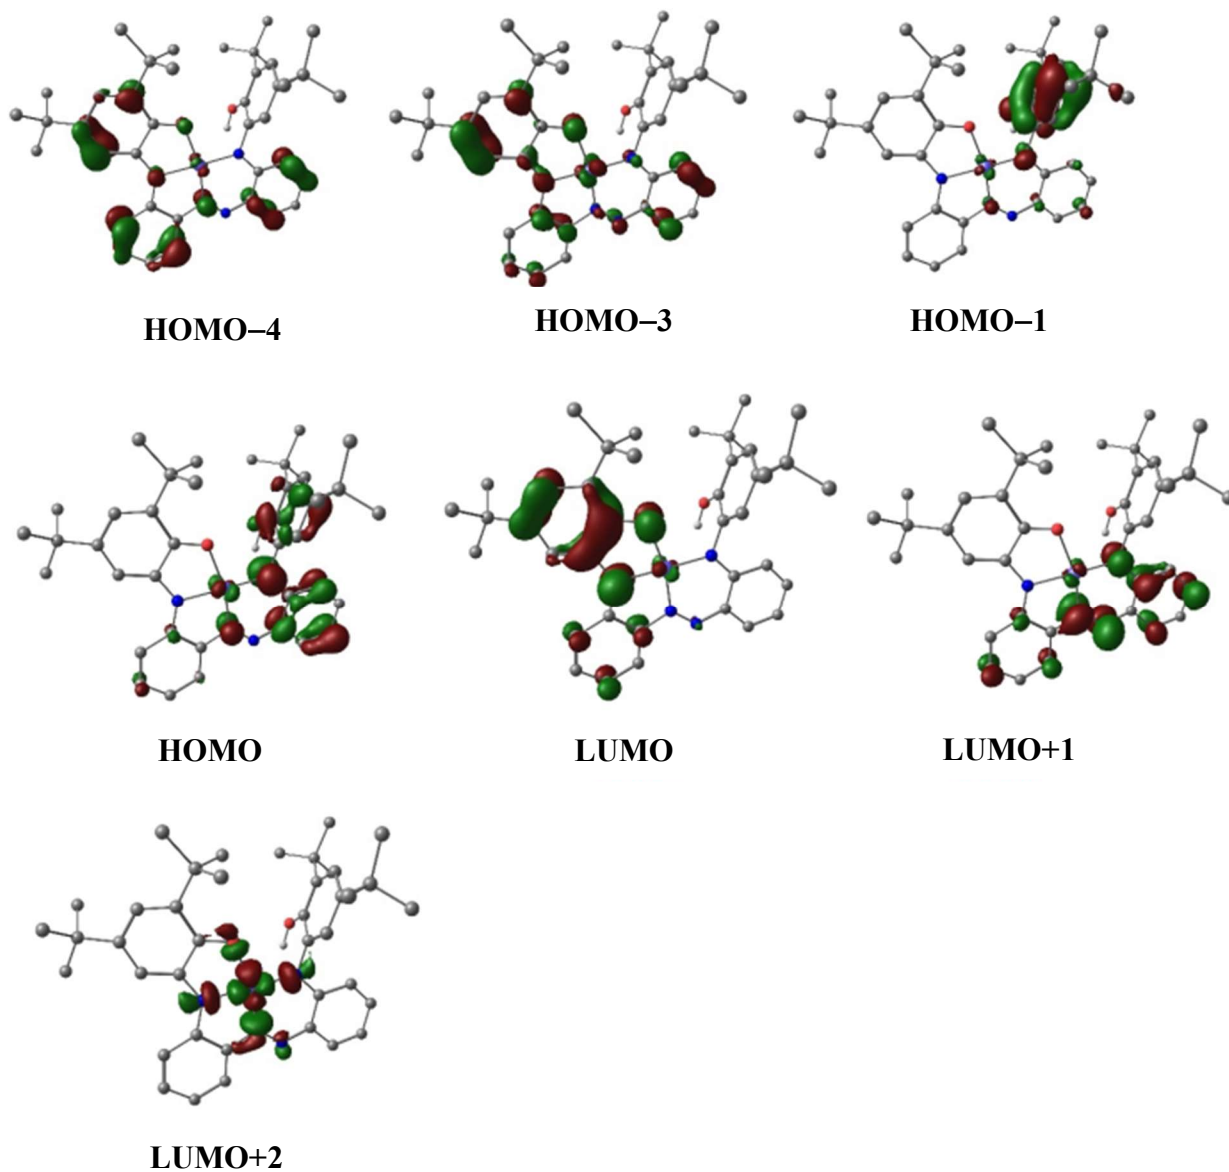

**Fig. S16** Representative molecular orbitals involved in TD-DFT transitions of  $[\text{Ni}^{\text{II}}\{\text{L}^{\text{IBQ}}\}^{1-}]^{1+}$  (1+/3).

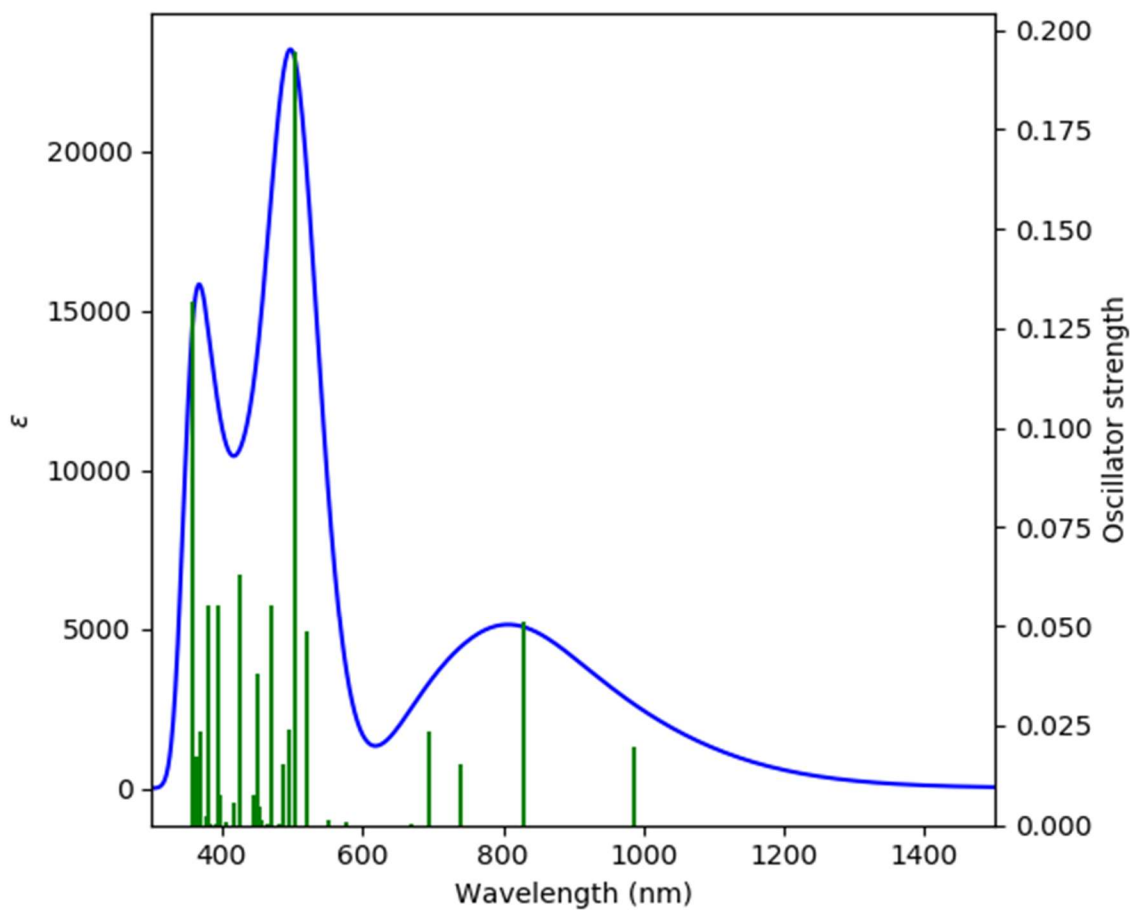

**Fig. S17** TD-DFT calculated electronic spectra for  $[\text{Pd}^{\text{II}}\{(\text{L}^{\text{ISQ}})^{2-}\}]$  (**2**).

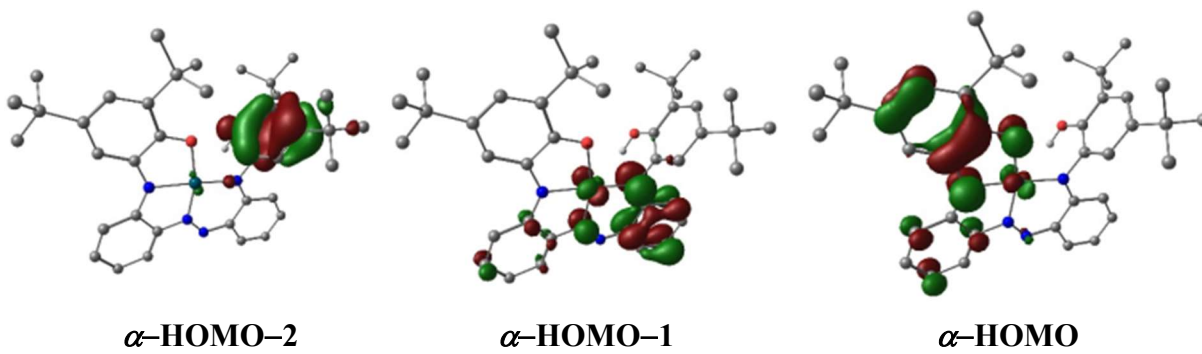

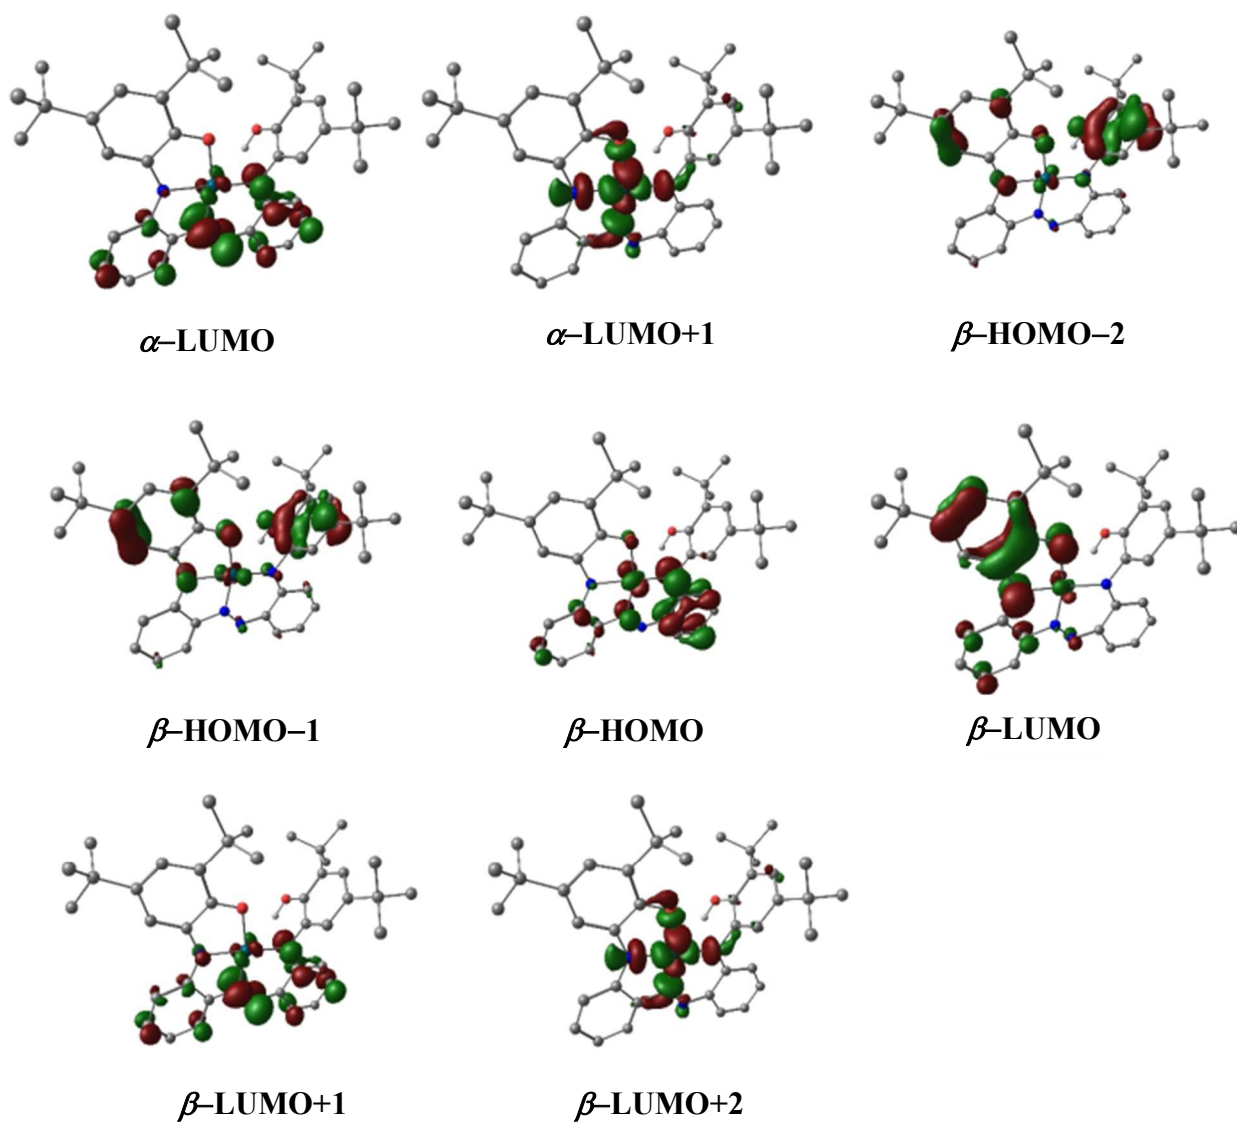

**Fig. S18** Representative molecular orbitals involved in TD-DFT transitions of  $[\text{Pd}^{\text{II}}\{(\text{L}^{\text{ISQ}})^{\bullet 2-}\}]$  (2).



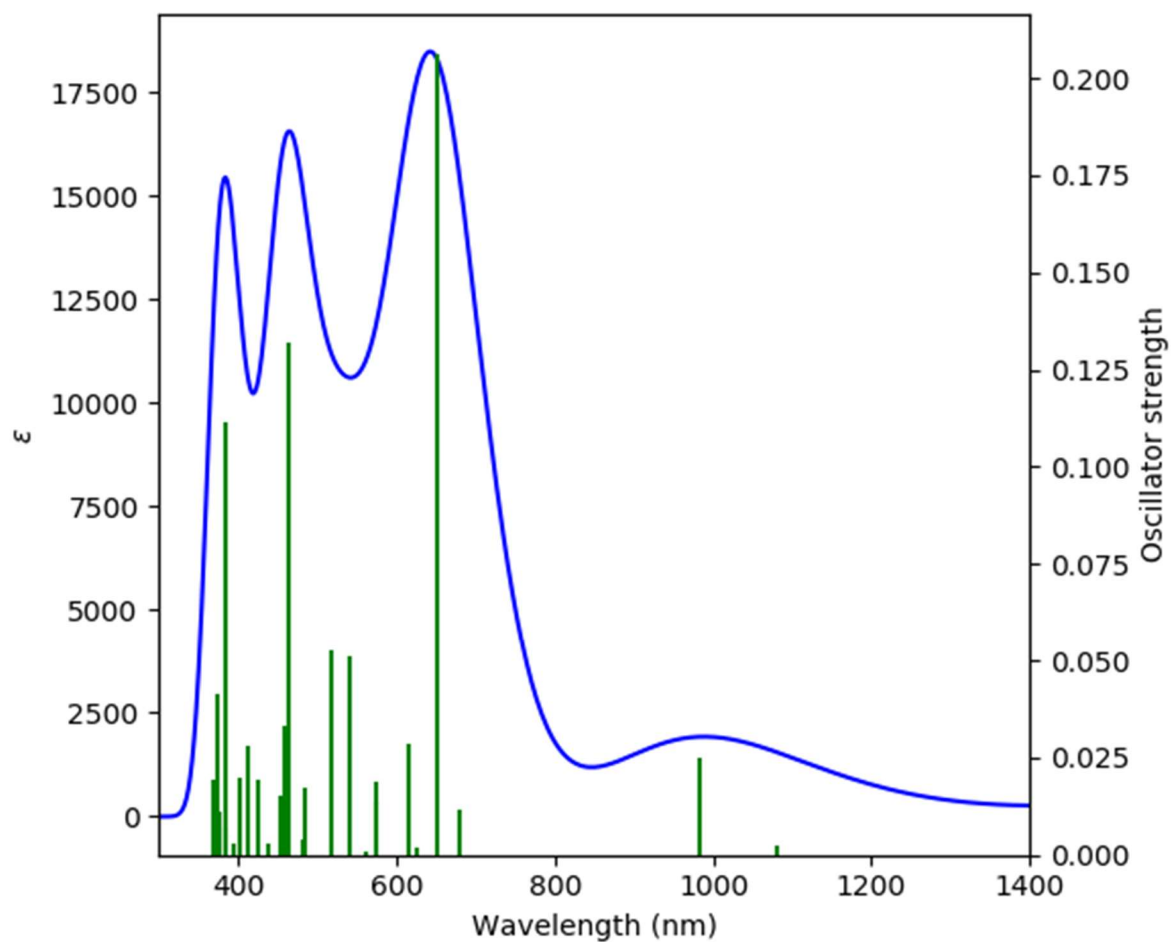

**Fig. S19** TD-DFT calculated electronic spectra for  $[\text{Pd}^{\text{II}}\{(\text{L}^{\text{AP}})^{2-}\}]$  (**4**).

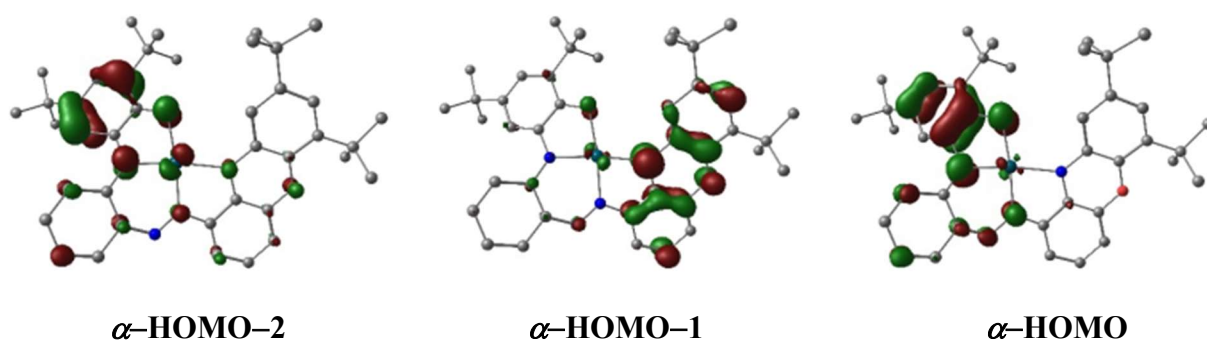

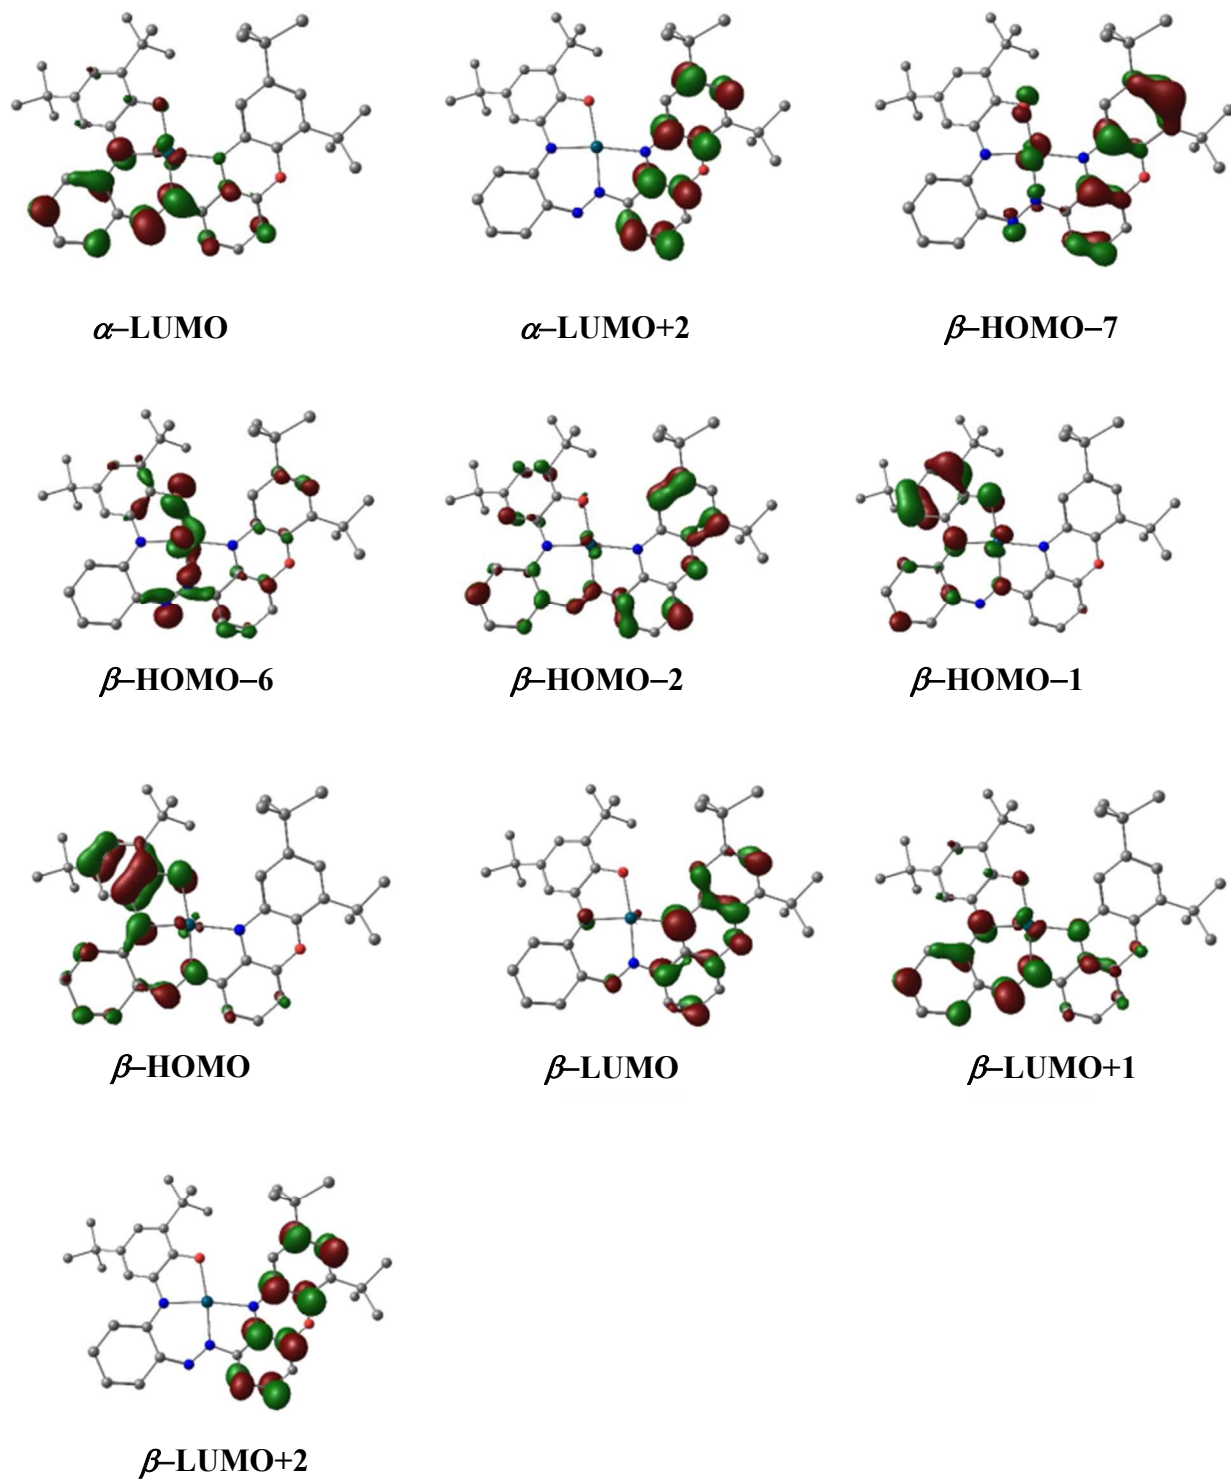

**Fig. S20** Representative molecular orbitals involved in TD-DFT transitions of  $[\text{Pd}^{\text{II}}\{(\text{L}^{\text{*AP})}{}^{2-}\}]$  (4).

**Table S1** Crystal data and structure refinement for **1–4**.

|                                                                    | <b>1</b>                                                                                      | <b>2</b>                                                                                      | <b>3•2CH<sub>2</sub>Cl<sub>2</sub></b>                                                                                            | <b>4</b>                                                                                      |
|--------------------------------------------------------------------|-----------------------------------------------------------------------------------------------|-----------------------------------------------------------------------------------------------|-----------------------------------------------------------------------------------------------------------------------------------|-----------------------------------------------------------------------------------------------|
| CCDC Number                                                        | 2221416                                                                                       | 2221418                                                                                       | 2221417                                                                                                                           | 2221419                                                                                       |
| Empirical formula                                                  | C <sub>40</sub> H <sub>49</sub> N <sub>4</sub> O <sub>2</sub> Ni                              | C <sub>40</sub> H <sub>49</sub> N <sub>4</sub> NiO <sub>2</sub> Pd                            | C <sub>84</sub> H <sub>104</sub> Cl <sub>8</sub> F <sub>12</sub> N <sub>8</sub><br>Ni <sub>2</sub> O <sub>4</sub> Sb <sub>2</sub> | C <sub>80</sub> H <sub>94</sub> N <sub>8</sub> O <sub>4</sub> Pd <sub>2</sub>                 |
| Formula weight                                                     | 676.52                                                                                        | 724.23                                                                                        | 2162.27                                                                                                                           | 1444.43                                                                                       |
| Crystal color, habit                                               | Violet                                                                                        | Pink                                                                                          | Red                                                                                                                               | Blue                                                                                          |
| Temperature (K)                                                    | 100 (2)                                                                                       | 100 (2)                                                                                       | 100 (2)                                                                                                                           | 100 (2)                                                                                       |
| Wavelength (Å)                                                     | MoKα (λ = 0.71073)                                                                            | MoKα (λ = 0.71073)                                                                            | MoKα (λ = 0.71073)                                                                                                                | MoKα (λ = 0.71073)                                                                            |
| Crystal system                                                     | triclinic                                                                                     | Triclinic                                                                                     | Triclinic                                                                                                                         | triclinic                                                                                     |
| Space group                                                        | <i>P</i> -1 (no. 2)                                                                           | <i>P</i> -1 (no. 2)                                                                           | <i>P</i> -1 (no. 2)                                                                                                               | <i>P</i> -1 (no. 2)                                                                           |
| <i>a</i> (Å)                                                       | 9.6539(7)                                                                                     | 9.6069(9)                                                                                     | 9.5233(14)                                                                                                                        | 13.9262(9)                                                                                    |
| <i>b</i> (Å)                                                       | 11.1929(8)                                                                                    | 11.3196(10)                                                                                   | 18.212(3)                                                                                                                         | 18.0565(11)                                                                                   |
| <i>c</i> (Å)                                                       | 17.3192(12)                                                                                   | 17.4614(16)                                                                                   | 27.463(4)                                                                                                                         | 18.0843(18)                                                                                   |
| α (°)                                                              | 71.713(2)                                                                                     | 72.042(3)                                                                                     | 81.734(4)                                                                                                                         | 103.105(2)                                                                                    |
| β (°)                                                              | 81.597(2)                                                                                     | 81.586(3)                                                                                     | 83.363(4)                                                                                                                         | 112.102(2)                                                                                    |
| γ (°)                                                              | 89.058(2)                                                                                     | 89.255(3)                                                                                     | 85.055(4)                                                                                                                         | 110.877(2)                                                                                    |
| Volume (Å <sup>3</sup> )                                           | 1757.0(2)                                                                                     | 1785.9(3)                                                                                     | 4670.2(12)                                                                                                                        | 3578.4(5)                                                                                     |
| <i>Z</i>                                                           | 2                                                                                             | 2                                                                                             | 2                                                                                                                                 | 2                                                                                             |
| Density <sub>calc</sub> (g cm <sup>-3</sup> )                      | 1.279                                                                                         | 1.347                                                                                         | 1.538                                                                                                                             | 1.341                                                                                         |
| μ (mm <sup>-1</sup> )                                              | 0.589                                                                                         | 0.559                                                                                         | 1.274                                                                                                                             | 0.558                                                                                         |
| no. reflns collcd                                                  | 33677                                                                                         | 28229                                                                                         | 56507                                                                                                                             | 56737                                                                                         |
| no. unique reflns                                                  | 8691                                                                                          | 8862                                                                                          | 16486                                                                                                                             | 17980                                                                                         |
| no. reflns used [ <i>I</i> > 2σ( <i>I</i> )]                       | 7104 [ <i>R</i> <sub>int</sub> = 0.0556, <i>R</i> <sub>sigma</sub> = 0.0551]                  | 7719 [ <i>R</i> <sub>int</sub> = 0.0438, <i>R</i> <sub>sigma</sub> = 0.0467]                  | 13430 [ <i>R</i> <sub>int</sub> = 0.0546, <i>R</i> <sub>sigma</sub> = 0.0547]                                                     | 14129 [ <i>R</i> <sub>int</sub> = 0.0496, <i>R</i> <sub>sigma</sub> = 0.0576]                 |
| Goodness-of-fit on <i>F</i> <sup>2</sup>                           | 1.114                                                                                         | 1.074                                                                                         | 1.032                                                                                                                             | 1.063                                                                                         |
| Final <i>R</i> indices [ <i>I</i> > 2σ( <i>I</i> )] <sup>a,b</sup> | <i>R</i> <sub>1</sub> = 0.0582 <sup>a</sup> ,<br><i>wR</i> <sub>2</sub> = 0.1304 <sup>b</sup> | <i>R</i> <sub>1</sub> = 0.0376 <sup>a</sup> ,<br><i>wR</i> <sub>2</sub> = 0.0824 <sup>b</sup> | <i>R</i> <sub>1</sub> = 0.0385 <sup>a</sup> ,<br><i>wR</i> <sub>2</sub> = 0.0903 <sup>b</sup>                                     | <i>R</i> <sub>1</sub> = 0.0421 <sup>a</sup> ,<br><i>wR</i> <sub>2</sub> = 0.0828 <sup>b</sup> |
| <i>R</i> indices (all data) <sup>a,b</sup>                         | <i>R</i> <sub>1</sub> = 0.0764 <sup>a</sup> ,<br><i>wR</i> <sub>2</sub> = 0.1392 <sup>b</sup> | <i>R</i> <sub>1</sub> = 0.0472 <sup>a</sup> ,<br><i>wR</i> <sub>2</sub> = 0.0887 <sup>b</sup> | <i>R</i> <sub>1</sub> = 0.0513 <sup>a</sup> ,<br><i>wR</i> <sub>2</sub> = 0.0983 <sup>b</sup>                                     | <i>R</i> <sub>1</sub> = 0.0632 <sup>a</sup> ,<br><i>wR</i> <sub>2</sub> = 0.0929 <sup>b</sup> |

$$^a R_1 = \sum ||F_o| - |F_c|| / \sum |F_o|. \quad ^b wR_2 = \{ \sum [w (|F_o|^2 - |F_c|^2)^2] / \sum [w (|F_o|^2)^2] \}^{1/2} .$$



|         |                   |                   |
|---------|-------------------|-------------------|
| C8–C7   | 1.425(3) [1.4294] | 1.410(4) [1.4096] |
| C7–C2   | 1.370(3) [1.3804] | 1.393(4) [1.3956] |
| C2–C1   | 1.439(3) [1.4434] | 1.422(4) [1.4287] |
| N2–N3   | 1.283(3) [1.2683] | 1.293(3) [1.2890] |
| C20–N2  | 1.428(3) [1.4251] | 1.353(3) [1.3452] |
| C21–N3  | 1.367(3) [1.3584] | 1.401(3) [1.3923] |
| C26–N4  | 1.350(3) [1.3501] | 1.372(3) [1.3611] |
| C27–N4  | 1.431(3) [1.4300] | 1.387(3) [1.3797] |
| C40–O2  | 1.366(3) [1.3680] | 1.377(3) [1.3753] |
| C25–O2  | NA                | 1.361(3) [1.3627] |
| C21–C26 | 1.447(3)[1.4604]  | 1.412(4)[1.4256]  |
| C21–C22 | 1.429(3)[1.4301]  | 1.389(4)[1.4005]  |
| C22–C23 | 1.355(3)[1.3694]  | 1.38794)[1.3934]  |
| C23–C24 | 1.409(4)[1.4159]  | 1.390(4)[1.4019]  |
| C24–C25 | 1.364(3)[1.3741]  | 1.379(4)[1.3864]  |
| C25–C26 | 1.431(3)[1.4342]  | 1.403(4)[1.4150]  |
| C40–C27 | 1.392(3)[1.4045]  | 1.412(4)[1.4240]  |
| C40–C35 | 1.401(3)[1.4127]  | 1.399(4)[1.4028]  |
| C35–C34 | 1.397(3)[1.3995]  | 1.387(4)[1.4003]  |
| C34–C29 | 1.399(3)[1.4068]  | 1.047(4)[1.4087]  |
| C29–C28 | 1.393(3)[1.3946]  | 1.390(4)[1.3932]  |
| C28–C27 | 1.394(3)[1.3981]  | 1.398(4)[1.4082]  |

**Table S4** DFT-optimized cartesian coordinates of  $[\text{Ni}^{\text{II}}\{\{\text{L}^{\text{ISQ}}\}^{2-}\}]$  (**1**)

|    |              |             |             |
|----|--------------|-------------|-------------|
| Ni | 6.733623000  | 5.732265000 | 6.489009000 |
| O  | 6.886470000  | 6.465192000 | 4.718884000 |
| N  | 5.510998000  | 7.142230000 | 6.740587000 |
| O  | 6.709039000  | 2.711659000 | 4.293348000 |
| H  | 6.417977000  | 3.071359000 | 5.144088000 |
| N  | 7.898399000  | 4.265332000 | 6.235176000 |
| N  | 6.395430000  | 5.310798000 | 8.270849000 |
| N  | 6.835727000  | 4.369822000 | 9.008321000 |
| C  | 5.055465000  | 7.271952000 | 8.036981000 |
| C  | 5.519451000  | 6.238024000 | 8.894084000 |
| C  | 5.189534000  | 7.819694000 | 5.611291000 |
| C  | 8.244401000  | 3.377442000 | 7.197945000 |
| C  | 11.813859000 | 5.059261000 | 3.161962000 |
| C  | 7.702963000  | 3.443830000 | 8.542379000 |
| C  | 4.007980000  | 9.387684000 | 4.190214000 |
| C  | 7.916873000  | 3.285112000 | 3.999912000 |
| C  | 9.764128000  | 4.707709000 | 4.688026000 |
| H  | 10.190938000 | 5.335580000 | 5.461262000 |
| C  | 8.532620000  | 4.106795000 | 4.956782000 |
| C  | 4.269572000  | 8.299353000 | 8.600496000 |
| H  | 3.970031000  | 9.150527000 | 8.006558000 |
| C  | 8.085132000  | 2.478016000 | 9.522407000 |

|   |              |              |              |
|---|--------------|--------------|--------------|
| H | 7.643027000  | 2.591050000  | 10.506899000 |
| C | 2.888749000  | 10.400288000 | 3.898072000  |
| C | 8.961285000  | 1.464835000  | 9.236042000  |
| H | 9.241989000  | 0.738078000  | 9.990673000  |
| C | 10.422646000 | 4.477036000  | 3.479181000  |
| C | 6.931841000  | 7.858737000  | 2.104021000  |
| C | 4.146709000  | 8.758844000  | 5.411665000  |
| H | 3.438974000  | 8.944201000  | 6.203547000  |
| C | 6.053051000  | 7.434930000  | 4.505828000  |
| C | 5.955726000  | 8.142739000  | 3.256705000  |
| C | 4.945361000  | 9.080775000  | 3.154677000  |
| H | 4.839241000  | 9.615649000  | 2.219856000  |
| C | 7.929473000  | 2.047333000  | 1.733014000  |
| C | 9.790547000  | 3.626180000  | 2.554822000  |
| H | 10.301101000 | 3.426291000  | 1.621653000  |
| C | 12.285849000 | 6.053170000  | 4.240536000  |
| H | 11.593764000 | 6.895271000  | 4.345764000  |
| H | 13.264989000 | 6.459401000  | 3.966033000  |
| H | 12.393325000 | 5.574844000  | 5.219575000  |
| C | 12.839255000 | 3.901836000  | 3.087076000  |
| H | 12.891292000 | 3.363682000  | 4.039467000  |
| H | 13.840085000 | 4.287078000  | 2.859146000  |
| H | 12.573450000 | 3.179078000  | 2.309566000  |
| C | 6.666815000  | 8.763833000  | 0.884794000  |
| H | 5.670373000  | 8.603037000  | 0.458959000  |
| H | 7.396328000  | 8.533047000  | 0.102160000  |
| H | 6.771445000  | 9.826998000  | 1.127675000  |
| C | 9.156061000  | 2.298119000  | 6.951958000  |
| H | 9.581245000  | 2.201119000  | 5.961959000  |
| C | 9.493524000  | 1.387478000  | 7.926082000  |
| H | 10.186544000 | 0.588584000  | 7.675810000  |
| C | 5.151825000  | 6.188851000  | 10.239860000 |
| H | 5.518250000  | 5.378237000  | 10.857081000 |
| C | 6.794030000  | 6.388369000  | 1.644568000  |
| H | 7.029209000  | 5.696457000  | 2.452933000  |
| H | 7.482115000  | 6.192658000  | 0.814195000  |
| H | 5.775908000  | 6.185151000  | 1.294120000  |
| C | 8.550243000  | 3.012315000  | 2.766765000  |
| C | 6.537342000  | 2.551724000  | 1.281250000  |
| H | 5.847971000  | 2.639849000  | 2.121684000  |
| H | 6.107171000  | 1.850991000  | 0.556095000  |
| H | 6.617218000  | 3.529835000  | 0.796107000  |
| C | 11.790937000 | 5.802220000  | 1.805927000  |
| H | 11.510944000 | 5.141915000  | 0.979880000  |
| H | 12.783030000 | 6.209595000  | 1.579760000  |
| H | 11.079057000 | 6.632840000  | 1.827249000  |

|   |             |              |              |
|---|-------------|--------------|--------------|
| C | 8.804737000 | 1.912933000  | 0.470346000  |
| H | 8.933036000 | 2.870362000  | -0.045856000 |
| H | 8.321010000 | 1.224529000  | -0.230211000 |
| H | 9.796719000 | 1.507268000  | 0.695373000  |
| C | 4.340347000 | 7.192741000  | 10.762304000 |
| H | 4.053195000 | 7.163887000  | 11.808699000 |
| C | 8.379942000 | 8.123872000  | 2.583573000  |
| H | 8.497499000 | 9.162721000  | 2.912025000  |
| H | 9.079170000 | 7.952215000  | 1.757516000  |
| H | 8.651528000 | 7.461594000  | 3.407089000  |
| C | 3.918309000 | 8.249756000  | 9.946013000  |
| H | 3.315230000 | 9.049778000  | 10.364894000 |
| C | 7.794899000 | 0.636463000  | 2.359111000  |
| H | 8.776373000 | 0.249498000  | 2.655025000  |
| H | 7.367061000 | -0.058236000 | 1.626927000  |
| H | 7.148918000 | 0.645553000  | 3.238325000  |
| C | 3.514909000 | 11.764804000 | 3.518647000  |
| H | 4.122676000 | 12.158350000 | 4.340009000  |
| H | 2.727507000 | 12.494266000 | 3.298236000  |
| H | 4.154833000 | 11.692357000 | 2.634548000  |
| C | 1.964546000 | 10.618799000 | 5.110552000  |
| H | 1.463090000 | 9.693661000  | 5.413407000  |
| H | 1.186946000 | 11.345474000 | 4.854907000  |
| H | 2.511289000 | 11.013518000 | 5.973521000  |
| C | 2.024001000 | 9.886727000  | 2.720617000  |
| H | 2.612859000 | 9.747850000  | 1.809365000  |
| H | 1.227102000 | 10.604308000 | 2.495425000  |
| H | 1.558022000 | 8.927191000  | 2.967286000  |

**Table S5** DFT-optimized cartesian coordinates of  $[\text{Ni}^{\text{II}}\{\text{(L}^{\text{IBQ})}^-\}]^{1+}$  ( $1^+/3$ ).

|    |              |              |              |
|----|--------------|--------------|--------------|
| Ni | 10.098746000 | 11.021574000 | 2.370786000  |
| O  | 10.277371000 | 12.913001000 | 2.926307000  |
| N  | 8.769283000  | 11.214796000 | 1.072851000  |
| N  | 11.380170000 | 10.786313000 | 3.776411000  |
| N  | 10.233512000 | 9.194749000  | 2.129857000  |
| N  | 9.619795000  | 8.404073000  | 1.335202000  |
| C  | 12.234586000 | 11.897150000 | 5.825225000  |
| H  | 12.521403000 | 10.985569000 | 6.324660000  |
| C  | 11.585620000 | 11.832121000 | 4.552532000  |
| C  | 12.412942000 | 13.111709000 | 6.424715000  |
| C  | 10.987295000 | 13.070017000 | 3.948037000  |
| C  | 8.278845000  | 10.219341000 | 0.301098000  |
| C  | 7.202320000  | 8.085667000  | -1.311333000 |
| H  | 6.781813000  | 7.301858000  | -1.930944000 |
| C  | 8.144020000  | 7.804952000  | -0.362769000 |
| H  | 8.506865000  | 6.797096000  | -0.192639000 |

|   |              |              |              |
|---|--------------|--------------|--------------|
| C | 8.318183000  | 12.551917000 | 0.801316000  |
| C | 11.855538000 | 9.483753000  | 3.871632000  |
| C | 13.047610000 | 13.277486000 | 7.806265000  |
| C | 8.704676000  | 8.836925000  | 0.459700000  |
| C | 6.780094000  | 9.432034000  | -1.471391000 |
| H | 6.027339000  | 9.667555000  | -2.218232000 |
| C | 8.937963000  | 13.325010000 | -0.181506000 |
| C | 7.292069000  | 10.454678000 | -0.707270000 |
| H | 6.940869000  | 11.466549000 | -0.858701000 |
| C | 11.194059000 | 8.595267000  | 2.983605000  |
| C | 7.199269000  | 13.037809000 | 1.502749000  |
| C | 12.916336000 | 9.003678000  | 4.666669000  |
| H | 13.505092000 | 9.679383000  | 5.270594000  |
| C | 11.287166000 | 14.366366000 | 4.547512000  |
| C | 11.976218000 | 14.319614000 | 5.726230000  |
| H | 12.205399000 | 15.257524000 | 6.213682000  |
| C | 13.432319000 | 11.927268000 | 8.437639000  |
| H | 12.562093000 | 11.277977000 | 8.579592000  |
| H | 13.873904000 | 12.099206000 | 9.422823000  |
| H | 14.176486000 | 11.391856000 | 7.838300000  |
| C | 8.451123000  | 14.595475000 | -0.502726000 |
| C | 6.665395000  | 14.308866000 | 1.203460000  |
| C | 13.249078000 | 7.656362000  | 4.625656000  |
| H | 14.070326000 | 7.288112000  | 5.230893000  |
| O | 6.603566000  | 12.250965000 | 2.450203000  |
| H | 7.095295000  | 11.421356000 | 2.512437000  |
| C | 7.326762000  | 15.046438000 | 0.208605000  |
| H | 6.929991000  | 16.020428000 | -0.035702000 |
| C | 12.538223000 | 6.776136000  | 3.796316000  |
| H | 12.802108000 | 5.723504000  | 3.777643000  |
| C | 10.833315000 | 15.675544000 | 3.888241000  |
| C | 11.517227000 | 7.238017000  | 2.968020000  |
| H | 10.987831000 | 6.572019000  | 2.299236000  |
| C | 11.410659000 | 15.756467000 | 2.453025000  |
| H | 12.505043000 | 15.710544000 | 2.463442000  |
| H | 11.122475000 | 16.711658000 | 2.003363000  |
| H | 11.028555000 | 14.957919000 | 1.815416000  |
| C | 12.036921000 | 13.988030000 | 8.744364000  |
| H | 11.758746000 | 14.983460000 | 8.386520000  |
| H | 12.484911000 | 14.110569000 | 9.735131000  |
| H | 11.121250000 | 13.399398000 | 8.857495000  |
| C | 14.329696000 | 14.140886000 | 7.672956000  |
| H | 15.063261000 | 13.661924000 | 7.016963000  |
| H | 14.786911000 | 14.264268000 | 8.659430000  |
| H | 14.125697000 | 15.141422000 | 7.281376000  |
| C | 9.287029000  | 15.725673000 | 3.839237000  |



|   |              |              |              |
|---|--------------|--------------|--------------|
| H | 8.870569000  | 14.919027000 | 3.235640000  |
| H | 8.971207000  | 16.674595000 | 3.394226000  |
| H | 8.860123000  | 15.669174000 | 4.846087000  |
| C | 5.380909000  | 14.832166000 | 1.885310000  |
| C | 11.331186000 | 16.902956000 | 4.675683000  |
| H | 10.916398000 | 16.943351000 | 5.688665000  |
| H | 11.007337000 | 17.810894000 | 4.160042000  |
| H | 12.424038000 | 16.938562000 | 4.742353000  |
| C | 5.560103000  | 14.906084000 | 3.421455000  |
| H | 5.802517000  | 13.934245000 | 3.853345000  |
| H | 4.631398000  | 15.259741000 | 3.882144000  |
| H | 6.352075000  | 15.614106000 | 3.687064000  |
| C | 4.200386000  | 13.888794000 | 1.541164000  |
| H | 4.038757000  | 13.849068000 | 0.458502000  |
| H | 3.280163000  | 14.262924000 | 2.002682000  |
| H | 4.372391000  | 12.873795000 | 1.902890000  |
| C | 5.004616000  | 16.245949000 | 1.396875000  |
| H | 5.787373000  | 16.980483000 | 1.614374000  |
| H | 4.097501000  | 16.572380000 | 1.914013000  |
| H | 4.793573000  | 16.272076000 | 0.322993000  |
| C | 9.086788000  | 15.403143000 | -1.652685000 |
| C | 8.531931000  | 16.838530000 | -1.735960000 |
| H | 9.040965000  | 17.382451000 | -2.537434000 |
| H | 7.461490000  | 16.855623000 | -1.963755000 |
| H | 8.693276000  | 17.392660000 | -0.805085000 |
| C | 8.780610000  | 14.683808000 | -2.989593000 |
| H | 9.215002000  | 15.235931000 | -3.830127000 |
| H | 9.195020000  | 13.670611000 | -3.005567000 |
| H | 7.701084000  | 14.608460000 | -3.156015000 |
| C | 10.619198000 | 15.495695000 | -1.469956000 |
| H | 10.876128000 | 16.011408000 | -0.539404000 |
| H | 11.096246000 | 14.510875000 | -1.453094000 |
| H | 11.063161000 | 16.056835000 | -2.298945000 |
| H | 9.784076000  | 12.894507000 | -0.707853000 |

**Table S6** DFT-optimized cartesian coordinates of  $[\text{Pd}^{\text{II}}\{\{\text{L}^{\text{ISQ}}\}^{2-}\}]$  (**2**).

|    |             |             |              |
|----|-------------|-------------|--------------|
| Pd | 6.761324000 | 5.713512000 | 6.479379000  |
| O  | 6.831624000 | 6.604527000 | 4.572128000  |
| N  | 6.380237000 | 5.317362000 | 8.369327000  |
| N  | 7.970860000 | 4.093224000 | 6.307602000  |
| N  | 6.804885000 | 4.377246000 | 9.107223000  |
| N  | 5.495221000 | 7.243470000 | 6.762070000  |
| O  | 6.787447000 | 2.538648000 | 4.369358000  |
| H  | 6.500640000 | 2.885669000 | 5.227072000  |
| C  | 5.514861000 | 6.293098000 | 8.943748000  |
| C  | 5.137734000 | 6.261781000 | 10.288886000 |

|   |              |              |              |
|---|--------------|--------------|--------------|
| H | 5.479744000  | 5.440598000  | 10.906264000 |
| C | 3.894828000  | 9.509365000  | 4.286691000  |
| C | 7.663898000  | 3.419932000  | 8.670079000  |
| C | 8.250110000  | 3.270305000  | 7.340849000  |
| C | 5.076671000  | 7.344557000  | 8.077884000  |
| C | 4.790451000  | 9.240615000  | 3.205559000  |
| H | 4.639291000  | 9.794081000  | 2.287912000  |
| C | 5.154036000  | 7.922954000  | 5.633952000  |
| C | 8.002633000  | 2.485109000  | 9.697996000  |
| H | 7.536847000  | 2.650343000  | 10.663875000 |
| C | 5.809080000  | 8.309897000  | 3.246773000  |
| C | 8.625302000  | 3.906281000  | 5.049965000  |
| C | 9.145599000  | 2.161696000  | 7.179041000  |
| H | 9.595007000  | 2.016291000  | 6.204919000  |
| C | 9.435397000  | 1.289915000  | 8.200997000  |
| H | 10.118290000 | 0.466487000  | 8.009348000  |
| C | 5.974663000  | 7.568686000  | 4.474204000  |
| C | 8.602390000  | 2.891725000  | 2.821899000  |
| C | 9.853689000  | 4.517494000  | 4.781185000  |
| H | 10.287165000 | 5.129627000  | 5.563198000  |
| C | 9.836258000  | 3.516984000  | 2.608923000  |
| H | 10.323819000 | 3.362573000  | 1.654800000  |
| C | 4.094266000  | 8.853771000  | 5.485410000  |
| H | 3.413979000  | 9.009473000  | 6.307043000  |
| C | 6.730825000  | 8.043498000  | 2.043082000  |
| C | 4.358297000  | 7.287357000  | 10.814404000 |
| H | 4.070694000  | 7.264502000  | 11.860700000 |
| C | 7.993708000  | 3.114054000  | 4.077234000  |
| C | 2.746301000  | 10.507779000 | 4.067658000  |
| C | 4.328743000  | 8.394407000  | 8.655354000  |
| H | 4.062137000  | 9.257183000  | 8.062533000  |
| C | 6.412041000  | 8.975301000  | 0.857078000  |
| H | 5.397254000  | 8.823853000  | 0.473269000  |
| H | 7.105204000  | 8.762368000  | 0.037265000  |
| H | 6.528461000  | 10.032750000 | 1.118764000  |
| C | 10.487178000 | 4.332443000  | 3.552623000  |
| C | 3.974796000  | 8.359065000  | 9.999418000  |
| H | 3.401361000  | 9.181181000  | 10.417038000 |
| C | 7.950143000  | 1.985200000  | 1.756002000  |
| C | 8.863784000  | 1.441329000  | 9.487525000  |
| H | 9.103784000  | 0.746613000  | 10.285095000 |
| C | 11.850407000 | 4.963178000  | 3.211007000  |
| C | 11.711798000 | 5.864782000  | 1.961475000  |
| H | 11.363505000 | 5.302591000  | 1.089782000  |
| H | 12.678940000 | 6.311838000  | 1.703450000  |
| H | 10.999068000 | 6.675679000  | 2.142325000  |

|   |              |              |              |
|---|--------------|--------------|--------------|
| C | 6.561709000  | 6.583365000  | 1.555438000  |
| H | 6.840068000  | 5.869909000  | 2.331328000  |
| H | 7.200041000  | 6.410260000  | 0.681243000  |
| H | 5.524895000  | 6.390811000  | 1.257785000  |
| C | 6.561827000  | 2.540179000  | 1.353783000  |
| H | 5.885840000  | 2.593094000  | 2.208008000  |
| H | 6.107669000  | 1.891336000  | 0.595731000  |
| H | 6.655178000  | 3.543707000  | 0.925759000  |
| C | 8.802676000  | 1.895266000  | 0.474223000  |
| H | 8.932648000  | 2.872028000  | -0.003855000 |
| H | 8.299892000  | 1.241919000  | -0.246163000 |
| H | 9.793680000  | 1.470462000  | 0.665905000  |
| C | 8.204310000  | 8.290222000  | 2.452006000  |
| H | 8.348311000  | 9.324200000  | 2.785231000  |
| H | 8.860065000  | 8.121408000  | 1.590146000  |
| H | 8.510222000  | 7.617647000  | 3.254597000  |
| C | 1.865669000  | 10.674281000 | 5.320086000  |
| H | 1.397419000  | 9.730313000  | 5.617942000  |
| H | 1.062259000  | 11.388491000 | 5.113348000  |
| H | 2.436152000  | 11.060277000 | 6.171595000  |
| C | 7.797769000  | 0.549035000  | 2.316389000  |
| H | 8.776000000  | 0.128770000  | 2.575371000  |
| H | 7.343194000  | -0.100818000 | 1.559618000  |
| H | 7.167562000  | 0.527951000  | 3.206711000  |
| C | 12.395753000 | 5.825693000  | 4.364882000  |
| H | 11.720662000 | 6.652754000  | 4.608119000  |
| H | 13.359913000 | 6.258801000  | 4.078993000  |
| H | 12.556038000 | 5.236070000  | 5.273638000  |
| C | 12.878920000 | 3.844007000  | 2.920630000  |
| H | 13.007142000 | 3.195122000  | 3.793474000  |
| H | 13.855111000 | 4.276240000  | 2.671963000  |
| H | 12.570686000 | 3.214663000  | 2.080253000  |
| C | 3.332330000  | 11.894192000 | 3.703480000  |
| H | 3.966171000  | 12.275511000 | 4.510766000  |
| H | 2.523699000  | 12.614554000 | 3.536471000  |
| H | 3.936846000  | 11.858647000 | 2.792626000  |
| C | 1.845647000  | 10.010911000 | 2.910169000  |
| H | 2.400592000  | 9.908529000  | 1.973204000  |
| H | 1.028060000  | 10.719500000 | 2.736720000  |
| H | 1.406624000  | 9.036320000  | 3.147136000  |

**Table S7** DFT-optimized cartesian coordinates of  $[\text{Pd}^{\text{II}}\{(\text{L}^{\text{*AP}})^{2-}\}]$  (4).

|    |             |             |             |
|----|-------------|-------------|-------------|
| Pd | 5.780779000 | 4.500217000 | 5.425370000 |
| O  | 6.218855000 | 5.537226000 | 3.693189000 |
| O  | 5.196251000 | 7.525675000 | 9.243709000 |
| N  | 5.572724000 | 3.328445000 | 7.020671000 |

|   |              |              |              |
|---|--------------|--------------|--------------|
| N | 5.380793000  | 5.995026000  | 6.898053000  |
| N | 5.484517000  | 2.042839000  | 7.052227000  |
| N | 6.174746000  | 2.937324000  | 4.249258000  |
| C | 5.446938000  | 5.419745000  | 8.129907000  |
| C | 5.451726000  | 5.580734000  | 10.572463000 |
| H | 5.399825000  | 6.197930000  | 11.462136000 |
| C | 5.577286000  | 4.004189000  | 8.238031000  |
| C | 5.747365000  | 1.700715000  | 4.555638000  |
| C | 5.358093000  | 6.174914000  | 9.323268000  |
| C | 5.466600000  | 1.292045000  | 5.936191000  |
| C | 7.590943000  | 2.464132000  | 2.266188000  |
| H | 7.714341000  | 1.433788000  | 2.575195000  |
| C | 8.211019000  | 2.925425000  | 1.111097000  |
| C | 4.790035000  | 7.947674000  | 5.594445000  |
| H | 4.907553000  | 7.333582000  | 4.707939000  |
| C | 5.513118000  | 0.707123000  | 3.543797000  |
| H | 5.592054000  | 1.014908000  | 2.509298000  |
| C | 5.057762000  | 7.334915000  | 6.833760000  |
| C | 6.834551000  | 3.329567000  | 3.076394000  |
| C | 6.783119000  | 4.733608000  | 2.804049000  |
| C | 5.139955000  | -0.081984000 | 6.192939000  |
| H | 4.986947000  | -0.346998000 | 7.233692000  |
| C | 5.661834000  | 3.399406000  | 9.498419000  |
| H | 5.765799000  | 2.323866000  | 9.557420000  |
| C | 4.580173000  | 9.463294000  | 8.002992000  |
| C | 5.139920000  | -0.576491000 | 3.843897000  |
| H | 4.941306000  | -1.272962000 | 3.034032000  |
| C | 9.056340000  | 1.960706000  | 0.256238000  |
| C | 10.266371000 | 1.466829000  | 1.085317000  |
| H | 10.901584000 | 2.306593000  | 1.385913000  |
| H | 10.877358000 | 0.769574000  | 0.499720000  |
| H | 9.947727000  | 0.949410000  | 1.995447000  |
| C | 5.608470000  | 4.189437000  | 10.645043000 |
| H | 5.682821000  | 3.717164000  | 11.619533000 |
| C | 4.942634000  | 8.108262000  | 8.023946000  |
| C | 4.376635000  | 9.276794000  | 5.534125000  |
| C | 4.985157000  | -0.999219000 | 5.192238000  |
| H | 4.715171000  | -2.025501000 | 5.418289000  |
| C | 8.051524000  | 4.289389000  | 0.792819000  |
| H | 8.513375000  | 4.655853000  | -0.112288000 |
| C | 4.296193000  | 9.999256000  | 6.740813000  |
| H | 3.991399000  | 11.033101000 | 6.694342000  |
| C | 4.041425000  | 9.938935000  | 4.183260000  |
| C | 5.848976000  | 10.359239000 | 10.008619000 |
| H | 6.183016000  | 9.368922000  | 10.320731000 |
| H | 5.777328000  | 10.989676000 | 10.901802000 |

|   |              |              |              |
|---|--------------|--------------|--------------|
| H | 6.615746000  | 10.789416000 | 9.355623000  |
| C | 7.367822000  | 5.208567000  | 1.590023000  |
| C | 9.592957000  | 2.626516000  | -1.025795000 |
| H | 8.781667000  | 2.989316000  | -1.665822000 |
| H | 10.170983000 | 1.898535000  | -1.604773000 |
| H | 10.255792000 | 3.469087000  | -0.803761000 |
| C | 8.199329000  | 0.743065000  | -0.165035000 |
| H | 7.828576000  | 0.186306000  | 0.701120000  |
| H | 8.790723000  | 0.049439000  | -0.774006000 |
| H | 7.332981000  | 1.059764000  | -0.755362000 |
| C | 3.396390000  | 9.733666000  | 10.232834000 |
| H | 2.420074000  | 9.712223000  | 9.737118000  |
| H | 3.305832000  | 10.363893000 | 11.124554000 |
| H | 3.636521000  | 8.721074000  | 10.559351000 |
| C | 4.478036000  | 10.314709000 | 9.288420000  |
| C | 5.799790000  | 7.107148000  | 1.079179000  |
| H | 5.307448000  | 6.536249000  | 0.284036000  |
| H | 5.715031000  | 8.171312000  | 0.830595000  |
| H | 5.265175000  | 6.922171000  | 2.011937000  |
| C | 8.007317000  | 7.553374000  | 2.265923000  |
| H | 7.561629000  | 7.416584000  | 3.252485000  |
| H | 7.957878000  | 8.615386000  | 1.997401000  |
| H | 9.065063000  | 7.274093000  | 2.328038000  |
| C | 7.285753000  | 6.694578000  | 1.198865000  |
| C | 4.078553000  | 11.772200000 | 8.976093000  |
| H | 4.807502000  | 12.270287000 | 8.328537000  |
| H | 4.031867000  | 12.337091000 | 9.912098000  |
| H | 3.092805000  | 11.840288000 | 8.504374000  |
| C | 3.096817000  | 9.025178000  | 3.368497000  |
| H | 3.541489000  | 8.049896000  | 3.158626000  |
| H | 2.861842000  | 9.492101000  | 2.405932000  |
| H | 2.155386000  | 8.859567000  | 3.903212000  |
| C | 7.954150000  | 6.988493000  | -0.159497000 |
| H | 9.027183000  | 6.769337000  | -0.149854000 |
| H | 7.840852000  | 8.052432000  | -0.392806000 |
| H | 7.494651000  | 6.422178000  | -0.976695000 |
| C | 5.357082000  | 10.163087000 | 3.402996000  |
| H | 6.027195000  | 10.832147000 | 3.953725000  |
| H | 5.150282000  | 10.618286000 | 2.427599000  |
| H | 5.886065000  | 9.223880000  | 3.233240000  |
| C | 3.341412000  | 11.302740000 | 4.351570000  |
| H | 2.418821000  | 11.220226000 | 4.936208000  |
| H | 3.075172000  | 11.695859000 | 3.365391000  |
| H | 3.987622000  | 12.046544000 | 4.829116000  |

**Table S8** TD-DFT-calculated electronic transitions of of  $[\text{Ni}^{\text{II}}\{\text{L}^{\text{ISQ}}\}^{2-}]$  (**1**).

| Excitation energy(eV) | $\lambda$ (nm) | $f$    | Transition                                                                                                                                                                                  | Character                                                                                                                                                                                                                                               |
|-----------------------|----------------|--------|---------------------------------------------------------------------------------------------------------------------------------------------------------------------------------------------|---------------------------------------------------------------------------------------------------------------------------------------------------------------------------------------------------------------------------------------------------------|
| 1.1957                | 1003           | 0.0225 | $\beta$ -H[~89%L] $\rightarrow$<br>$\beta$ -L[~94%L](80%)                                                                                                                                   | MLCT (Metal $\rightarrow$ iminosemiquinonate ring)<br>CT (azo appended amidophenyl ring $\rightarrow$ iminosemiquinonate ring)                                                                                                                          |
| 1.4586                | 822            | 0.0396 | $\alpha$ -H-1[~84%L] $\rightarrow$<br>$\alpha$ -L[~95%L](13%)<br>$\beta$ -H-2[~90%L] $\rightarrow$<br>$\beta$ -L[~94%L](57%)                                                                | CT (azo appended amidophenyl ring $\rightarrow$ azo)<br>MLCT (metal $\rightarrow$ azo)<br>CT (amido phenol $\rightarrow$ iminosemiquinonate ring and amido phenyl ring)                                                                                 |
| 1.6146                | 743            | 0.0109 | $\alpha$ -H-1[~84%L] $\rightarrow$<br>$\alpha$ -L[~95%L](37%)<br>$\beta$ -H-2[~90%L] $\rightarrow$<br>$\beta$ -L[~94%L](12%)<br>$\beta$ -H[~89%L] $\rightarrow$<br>$\beta$ -L+1[~95%L](30%) | CT (azophenyl ring $\rightarrow$ azo)<br>MLCT (metal $\rightarrow$ azo)<br>CT (amido phenol $\rightarrow$ iminosemiquinonate ring and amido phenyl ring)<br>CT (iminosemiquinonato O and N $\rightarrow$ azo) MLCT (metal $\rightarrow$ azo)            |
| 1.7351                | 691            | 0.0181 | $\alpha$ -H[~93%L] $\rightarrow$<br>$\alpha$ -L[~95%L](91%)                                                                                                                                 | CT (iminosemiquinonate ring $\rightarrow$ azo and azo appended amidophenyl ring)                                                                                                                                                                        |
| 2.4137                | 497            | 0.0906 | $\alpha$ -H-1[~84%L] $\rightarrow$<br>$\alpha$ -L[~95%L](17%)<br>$\beta$ -H-4[~94%L] $\rightarrow$<br>$\beta$ -L[~94%L](17%)<br>$\beta$ -H[~89%L] $\rightarrow$<br>$\beta$ -L+1[~95%L](30%) | CT (azoamidophenyl ring $\rightarrow$ azo)<br>MLCT (metal $\rightarrow$ azo)<br>CT (azo and azo appended amidophenyl ring $\rightarrow$ iminosemiquinonate ring)<br>CT (iminosemiquinonato O and N $\rightarrow$ azo)<br>MLCT (metal $\rightarrow$ azo) |
| 2.8339                | 423            | 0.0645 | $\beta$ -H-9[~72%M] $\rightarrow$<br>$\beta$ -L[~94%L](11%)<br>$\beta$ -H-8[~60%M] $\rightarrow$<br>$\beta$ -L[~94%L](73%)                                                                  | MLCT (metal $\rightarrow$ iminosemiquinonate ring)<br>MLCT (metal $\rightarrow$ iminosemiquinonate ring)                                                                                                                                                |

<sup>a</sup>H and L stands for KS-HOMO and KS-LUMO, respectively.

<sup>b</sup>CT and MLCT stands for charge transfer and metal-to-ligand charge transfer, respectively.

**Table S9** TD-DFT-calculated electronic transitions of  $[\text{Ni}^{\text{II}}\{\text{L}^{\text{IBQ}}\}]^{1+}$  (**1<sup>+</sup>/3**).

| Excitation energy(eV) | $\lambda$ (nm) | $f$    | Transition                                  | Character                                                                            |
|-----------------------|----------------|--------|---------------------------------------------|--------------------------------------------------------------------------------------|
| 1.7002                | 705            | 0.1252 | H-3[~90%L] $\rightarrow$<br>L+2[~40%M](87%) | LMCT (iminoquinone ring, azo and azo appended amido phenyl ring $\rightarrow$ metal) |

|        |     |        |                                                                         |                                                                                                                                                                                    |
|--------|-----|--------|-------------------------------------------------------------------------|------------------------------------------------------------------------------------------------------------------------------------------------------------------------------------|
| 2.4191 | 496 | 0.1095 | H-1[~96%L]→<br>L+1[~96%L](25%)<br>H[~91%L]→<br>L+1[~96%L](43%)          | CT (amido phenol ring → azo<br>and azo appended amido phenyl<br>ring)<br>CT (amido phenol ring → azo)                                                                              |
| 2.6443 | 453 | 0.1188 | H-1[~96%L]→<br>L+2[~40%M](59%)<br>H[~91%L]→<br>L+2[~40%M](14%)          | LMCT (amido phenol ring →<br>metal)<br>LMCT (amido phenol ring and<br>azo appended amido phenyl ring<br>→ metal)                                                                   |
| 2.7359 | 438 | 0.2291 | H-8[~66%M]→<br>L[~94%L](24%)<br>H-6[~90%L]→<br>L[~94%L](50%)            | MLCT (metal → iminoquinone<br>ring)<br>CT (amido phenyl ring →<br>iminoquinone ring)                                                                                               |
| 3.1842 | 376 | 0.1254 | H-14[~86%L]→<br>L [~94%L] (20%)<br><br>H-3[~90%L]→<br>L+1 [~96%L] (63%) | CT (tert-butyl moiety of<br>iminoquinone ring →<br>iminoquinone) and minor MLCT<br>(metal → iminoquinone)<br>CT (iminoquinone ring → azo<br>and azo appended amido phenyl<br>ring) |
| 3.5768 | 335 | 0.1537 | H-4[~97%L]→<br>L+1[~96%L] (88%)                                         | CT (iminoquinone ring → azo<br>and azo appended amido phenyl<br>ring)                                                                                                              |

<sup>a</sup>H and L stands for KS-HOMO and KS-LUMO, respectively.

<sup>b</sup>CT, MLCT and LMCT stands for charge transfer, metal-to-ligand charge transfer and ligand-to-metal charge transfer, respectively.

**Table S10** TD-DFT-calculated electronic transitions of [Pd<sup>II</sup>{(L<sup>ISQ</sup>)<sup>2-</sup>}] (**2**).

| Excitation energy(eV) | $\lambda$ (nm) | f      | Transition                                                                                                                                         | Character                                                                                                                                                                              |
|-----------------------|----------------|--------|----------------------------------------------------------------------------------------------------------------------------------------------------|----------------------------------------------------------------------------------------------------------------------------------------------------------------------------------------|
| 1.2165                | 986            | 0.0196 | $\beta$ -H[~89%L]→<br>$\beta$ -L[~95%L](81%)                                                                                                       | CT (azo and azo appended amido<br>phenyl ring→<br>iminosemiquinonate ring) and<br>minor MLCT (Metal →<br>iminosemiquinonate ring)                                                      |
| 1.4486                | 828            | 0.0513 | $\alpha$ -H-1[~88%L]→<br>$\alpha$ -L[~94%L](14%)<br>$\beta$ -H-2[~95%L]→<br>$\beta$ -L[~95%L](27%)<br>$\beta$ -H[~89%L]→<br>$\beta$ -L[~95%L](43%) | CT (azo appended amido phenyl<br>ring → azo) and minor MLCT<br>(metal → azo)<br>CT (amido phenol ring →<br>iminosemiquinonate ring)<br>CT (azo and azo appended amido<br>phenyl ring → |

|        |     |        |                                                                                                                                                    |                                                                                                                                                                                                                          |
|--------|-----|--------|----------------------------------------------------------------------------------------------------------------------------------------------------|--------------------------------------------------------------------------------------------------------------------------------------------------------------------------------------------------------------------------|
| 1.6214 | 740 | 0.0152 | $\alpha$ -H-1[~88%L]→<br>$\alpha$ -L[~94%L](37%)<br>$\beta$ -H[~89%L]→<br>$\beta$ -L[~95%L](15%)<br>$\beta$ -H[~89%L]→<br>$\beta$ -L+1[~94%L](27%) | iminosemiquinonate ring)<br>CT (azo appended amido phenyl ring → azo) and minor MLCT (metal → azo)<br>CT (azo and azo appended amido phenyl ring → iminosemiquinonate ring)<br>CT (azo appended amido phenyl ring → azo) |
| 1.7302 | 693 | 0.0233 | $\alpha$ -H[~93%L]→<br>$\alpha$ -L[~94%L](91%)                                                                                                     | CT (iminosemiquinonate ring → azo and azo appended amido phenyl ring)                                                                                                                                                    |
| 2.3812 | 503 | 0.1947 | $\alpha$ -H-1[~88%L]→<br>$\alpha$ -L[~94%L](37%)<br>$\beta$ -H[~89%L]→<br>$\beta$ -L+1[~94%L](44%)                                                 | CT (azo appended amido phenyl ring → azo) and minor MLCT (metal → azo)<br>CT (azo appended amido phenyl ring → azo)                                                                                                      |
| 3.3513 | 358 | 0.1318 | $\alpha$ -H-2[~97%L]→<br>$\alpha$ -L+1[~60%L](21%)<br>$\beta$ -H-2[~95%L]→<br>$\beta$ -L+2[~62%L](23%)                                             | LMCT (amido phenol ring → metal)<br>LMCT (amido phenyl ring → metal)                                                                                                                                                     |

<sup>a</sup>H and L stands for KS-HOMO and KS-LUMO, respectively.

<sup>b</sup>CT, MLCT and LMCT stands for charge transfer, metal-to-ligand charge transfer and ligand-to-metal charge transfer, respectively.

**Table S11** TD-DFT-calculated electronic transitions of [Pd<sup>II</sup>{(L<sup>\*AP</sup>)<sup>2-</sup>}] (**4**).

| Excitation energy(eV) | $\lambda$ (nm) | f      | Transition                                                                                                                                         | Character                                                                                                                                         |
|-----------------------|----------------|--------|----------------------------------------------------------------------------------------------------------------------------------------------------|---------------------------------------------------------------------------------------------------------------------------------------------------|
| 1.2197                | 983            | 0.0247 | $\alpha$ -H[~95%L]→<br>$\alpha$ -L[~94%L](25%)<br>$\beta$ -H-1[~90%L]→<br>$\beta$ -L[~98%L](46%)<br>$\beta$ -H[~95%L]→<br>$\beta$ -L+1[~94%L](24%) | CT (amidophenolate ring → azo and amidophenyl ring)<br>CT (amidophenolate ring → phenoxazine-ring)<br>CT (amidophenolate ring → phenoxazine-ring) |
| 1.7649                | 679            | 0.0116 | $\beta$ -H-2[~96%L]→<br>$\beta$ -L[~98%L](84%)                                                                                                     | CT (azo and amidophenolate moiety → phenoxazine-ring)                                                                                             |
| 1.8408                | 651            | 0.2064 | $\alpha$ -H[~95%L]→<br>$\alpha$ -L[~94%L](36%)<br>$\beta$ -H[~95%L]→<br>$\beta$ -L+1[~94%L](45%)                                                   | CT (amido phenyl → amido phenolate ring)<br>CT (amidophenolate ring → azo and amidophenyl ring)                                                   |



|        |     |        |                                                                                                                                                          |                                                                                                                                                                                                          |
|--------|-----|--------|----------------------------------------------------------------------------------------------------------------------------------------------------------|----------------------------------------------------------------------------------------------------------------------------------------------------------------------------------------------------------|
| 1.9487 | 615 | 0.0287 | $\alpha$ -H-2[~89%L]→<br>$\alpha$ -L[~94%L](22%)<br>$\alpha$ -H-1[~96%L]→<br>$\alpha$ -L[~94%L](29%)<br>$\beta$ -H-1[~90%L]→<br>$\beta$ -L+1[~94%L](24%) | CT (amidphenolate ring → azo<br>and amido phenyl ring) and<br>minor MLCT (metal → azo)<br>CT (phenoxazine-ring → azo and<br>amido phenyl ring)<br>CT (amidphenolate ring → azo<br>and amido phenyl ring) |
| 2.5897 | 463 | 0.1319 | $\beta$ -H-7[~85%L]→<br>$\beta$ -L[~98%L](24%)<br>$\beta$ -H-6[~81%L]→<br>$\beta$ -L[~98%L](58%)                                                         | MLCT (metal → phenoxazine-<br>ring)<br>CT (amidphenolate ring →<br>phenoxazine-ring) and MLCT<br>(metal → phenoxazine-ring)                                                                              |
| 3.1188 | 384 | 0.1116 | $\alpha$ -H-1[~96%L]→<br>$\alpha$ -L+2[~99%L](46%)                                                                                                       | $\pi$ to $\pi^*$ transition                                                                                                                                                                              |

<sup>a</sup>H and L stands for KS-HOMO and KS-LUMO, respectively.

<sup>b</sup>CT and MLCT stands for charge transfer and metal-to-ligand charge transfer, respectively.

### Scheme S1

Reference 32 in the text: Chandan Mukherjee and co-workers: *Dalton Trans.*, 2015, **44**, 3724–3727.

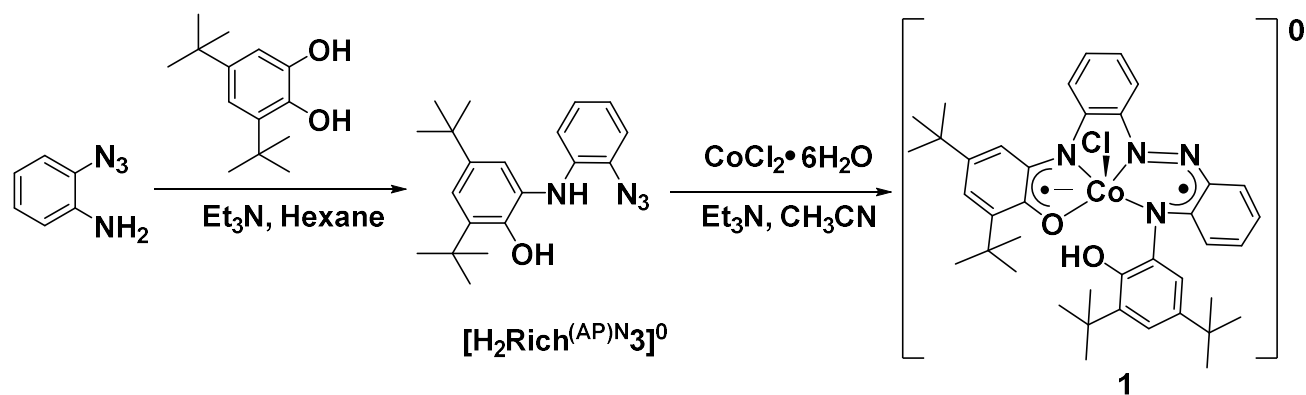

- ✓ Co(II) (3d series) complex.
- ✓ Six-membered chelate ring holds a dangling phenol.
- ✓ Phenol ring is out of plane.
- ✓ No intraligand cyclization (phenoxazine ring formation) in the presence of Et<sub>3</sub>N under air.
